# Supplementary material
Source: PubMed Central journal article supplement (PMC10666726)
Supplement: sj-pdf-1-ebm-10.1177_15353702221110649.pdf [file sj-pdf-1-ebm-10.1177_15353702221110649.pdf]

## Supplementary Files

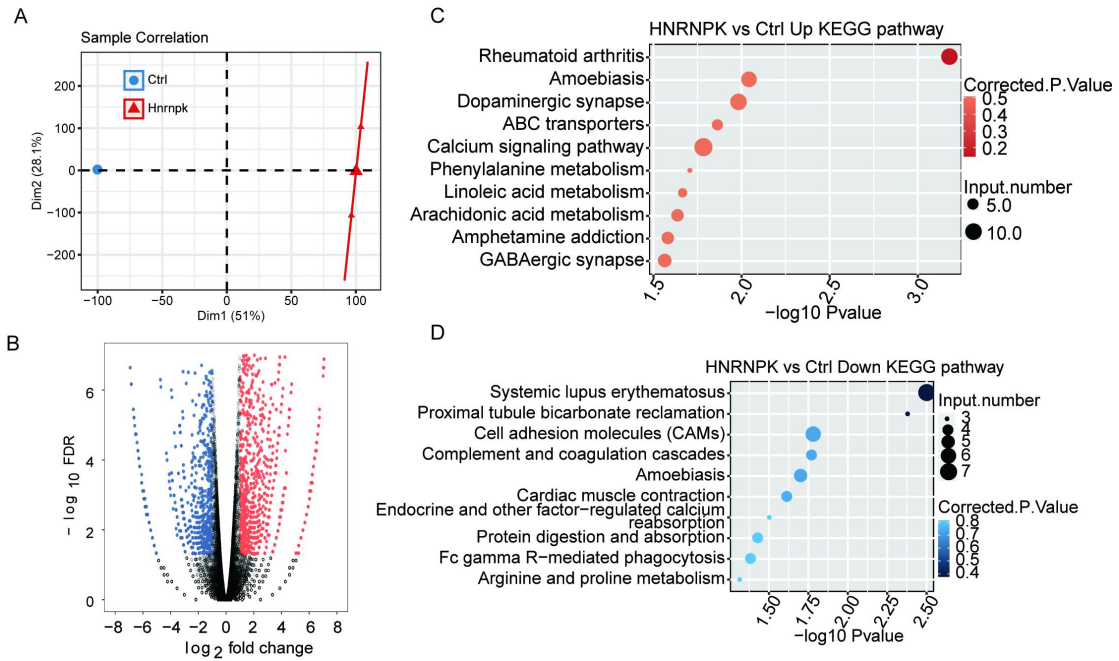

**Figure S1. HNRNPK overexpression regulated the global transcriptome profile in HeLa cells.**

- Principal component analysis (PCA) result showing the clear separation between HNRNPK-OE and Ctrl samples.
- Volcano plot showing the differentially expressed genes (DEGs) between HNRNPK-OE and Ctrl samples. Red and blue points represented upregulated and downregulated genes, respectively.
- Bubble plot showing the top ten KEGG pathways of upregulated genes.
- Bubble plot showing the top ten KEGG pathways of downregulated genes.

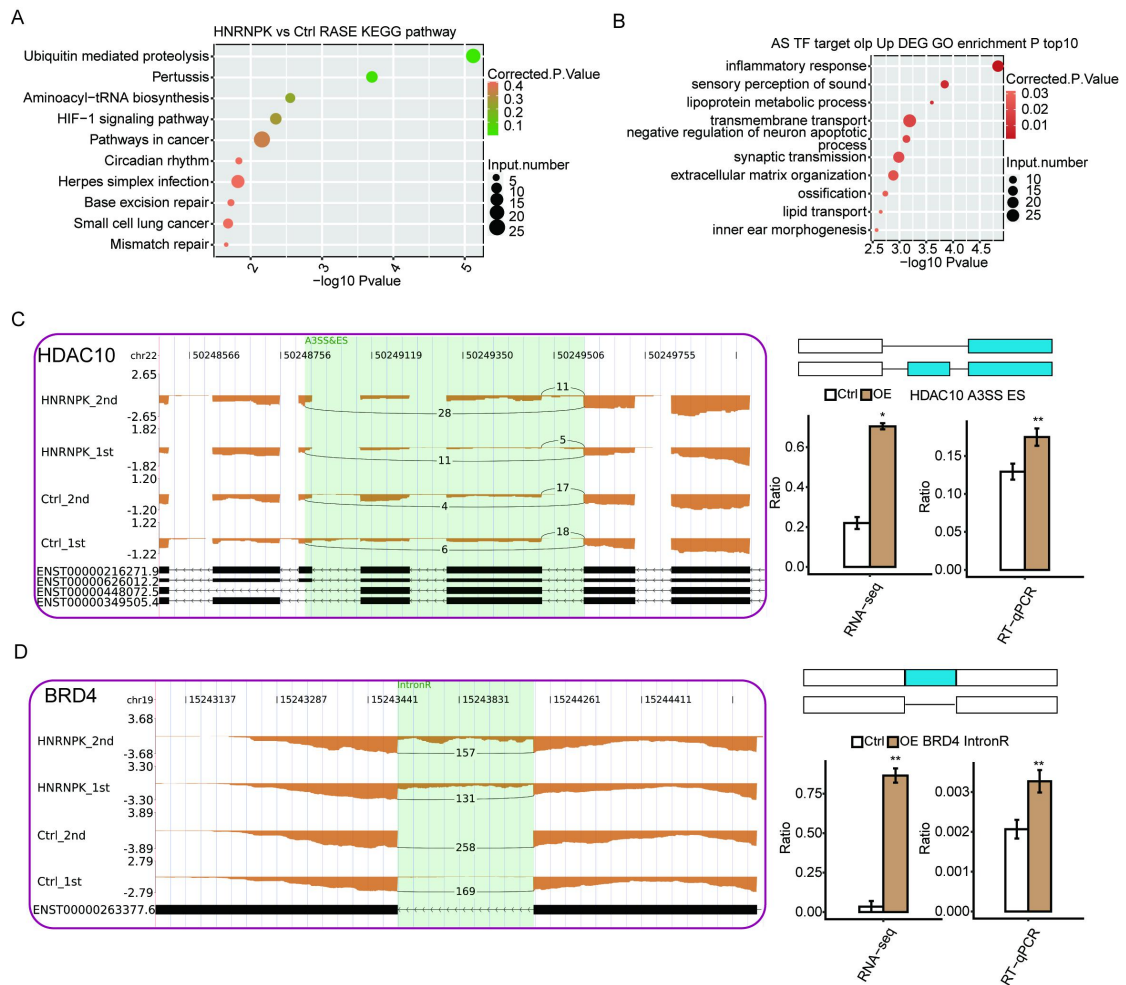

**Figure S2. HNRNP overexpression influenced the alternative splicing profile in HeLa cells.**

- Bubble plot showing the top ten KEGG pathways of RASGs predicted in this study.
- Bubble plot showing the top ten GO BP terms of the overlapped genes between TF targets and up DEGs.
- Validation of A3SS&ES event from HDAC10. The number of junction reads was marked on the line representing RASE-associated splice junctions. The structure of the RASE was depicted in the top-right panel. The altered RASE ratio between RNA-sequencing and in RT-qPCR result were calculated and plotted (right panel, bottom).
- Validation of intron retention event from BRD4. The detail information had been described in C.

**Table S1. Primers sets, related to the experimental procedures.**

RT-qPCR primers for gene expression qualification.

| Gene   | Primer  | Sequence (5'-3')         | Related Figures |
|--------|---------|--------------------------|-----------------|
| GAPDH  | Forward | CGGAGTCAACGGATTTGGTCGTAT | Figure 1        |
|        | Reverse | AGCCTTCTCCATGGTGGTGAAGAC |                 |
| HNRNPK | Forward | GCCCTGCAGAAGATATGGAA     | Figure 1        |
|        | Reverse | CACTGCTGTCTGGGACTGAA     |                 |

RT-qPCR primers for DEGs.

| DEGs   | Primer  | Sequence (5'-3')   | Related Figures |
|--------|---------|--------------------|-----------------|
| CCL5   | Forward | CCTGCTGCTTTGCCTAC  | Figure 5        |
|        | Reverse | AGGTTGGGTCGTCAGC   |                 |
| CPEB4  | Forward | TGGATTCTTGGATGATGG | Figure 5        |
|        | Reverse | TTACCCCTTTCTCACCTT |                 |
| MSX1   | Forward | GTGCCTCGCTCTACGGT  | Figure 5        |
|        | Reverse | CCTTTGACTCCCGTCTC  |                 |
| BCL6   | Forward | TTGCAACATCTGTGGGG  | Figure 5        |
|        | Reverse | CTTCGGGATGTTTACGC  |                 |
| APOE   | Forward | GGTCGCTTTTGGGATT   | Figure 5        |
|        | Reverse | GAGGGTCCAGTGGGTC   |                 |
| SCN1B  | Forward | CGTGTATGGGATGACCTT | Figure 5        |
|        | Reverse | TCTTCCCGTGACTCCTCA |                 |
| CDKN2D | Forward | AGGAGGGAGGGTGAAGTA | Figure 5        |
|        | Reverse | GAAACGTCCGGCGG     |                 |

RT-qPCR primers for RASEs.

| RASGs  | Primer* | Sequence (5'-3')       | Related Figures |
|--------|---------|------------------------|-----------------|
| BRD4   | M-F     | CGTTGTGCAAAGCTGGAGGAGA | Figure S2       |
|        | AS-F    | CACGGCTCACCTGGAGGAGA   |                 |
|        | M/AS-R  | CCACTTCACCCAGCCCATCC   |                 |
| HSF1   | M/AS-F  | ATCCAAGAGCTCCTGTCTCC   | Figure 4        |
|        | AS-R    | AGCTGCTTCCCTGAATCCGG   |                 |
|        | M-R     | TAGTGCACCAGCTGAATCCGG  |                 |
| HDAC10 | M-F     | GTAAAGGACGCTGGGGTCAT   | Figure S2       |
|        | AS-F    | GAGTCAAATCCTGGGGTCAT   |                 |
|        | M/AS-R  | TCGTGGACTGGGATGTGC     |                 |
| IRF1   | M-F     | TGCTCCAAGAGCTGGAGTCAG  | Figure 4        |
|        | AS-F    | CCAATATCCCCTGGAGTCAG   |                 |
|        | M/AS-R  | CTCTGCCTGATGACCACA     |                 |

\* M: model; AS: alternative spliced; F: forward; R: reverse.

Table S2. Detailed information on the DEGs.

| Gene               | logFC        | logCPM       | PValue      | FDR         | Ct1st | Ct2nd | Hnr1st | Hnr2nd | Symbol       | Chr   | GeneType             | Description                                                                                |
|--------------------|--------------|--------------|-------------|-------------|-------|-------|--------|--------|--------------|-------|----------------------|--------------------------------------------------------------------------------------------|
| ENSG00000204444.10 | -1.363038589 | -0.12667311  | 6.71E-05    | 0.001113296 | 0.68  | 0.75  | 0.19   | 0.3    | APOM         | chr6  | protein_coding       | apolipoprotein M                                                                           |
| ENSG00000106624.8  | -3.190558554 | -1.924196709 | 8.83E-05    | 0.001376364 | 0.12  | 0.04  | 0.01   | 0      | AEBP1        | chr7  | protein_coding       | AE binding protein 1                                                                       |
| ENSG00000268975.1  | -1.025973248 | 1.396188456  | 8.36E-06    | 0.000199174 | 3.07  | 2.47  | 1.32   | 1.05   | MIA-RAB4B    | chr19 | protein_coding       | MIA-RAB4B readthrough (NMD candidate)                                                      |
| ENSG00000259205.2  | 1.377056292  | -0.407769897 | 7.63E-05    | 0.001229386 | 0.19  | 0.52  | 0.71   | 0.95   | PRKXP1       | chr15 | processed_pseudogene | protein kinase, X-linked, pseudogene 1                                                     |
| ENSG00000180279.5  | -5.656635354 | -2.632982121 | 0.000305021 | 0.003673222 | 0.03  | 0.35  | 0      | 0      | MGC45922     | chr19 | lincRNA              |                                                                                            |
| ENSG00000279474.1  | 6.215668795  | -2.493259686 | 2.24E-05    | 0.000452395 | 0     | 0     | 0.21   | 0      | CTD-2286N8.1 | chr18 | TEC                  |                                                                                            |
| ENSG00000228643.1  | 5.119080049  | -1.638826874 | 4.75E-11    | 4.67E-09    | 0.07  | 0     | 1.09   | 1.52   | AC079779.4   | chr2  | processed_transcript |                                                                                            |
| ENSG00000227972.1  | 3.234685255  | -1.393017069 | 3.23E-08    | 1.73E-06    | 0.05  | 0.01  | 0.24   | 0.26   | PRKRIP3      | chr10 | processed_pseudogene | protein-kinase, interferon-inducible double stranded RNA dependent inhibitor, repressor of |

|                    |              |              |             |             |        |       |       |       |   |               |       |                                  |                                                              |  |  |                                 |
|--------------------|--------------|--------------|-------------|-------------|--------|-------|-------|-------|---|---------------|-------|----------------------------------|--------------------------------------------------------------|--|--|---------------------------------|
|                    |              |              |             |             |        |       |       |       |   |               |       |                                  |                                                              |  |  | (P58 repressor)<br>pseudogene 3 |
| ENSG00000261399.1  | -5.845005344 | -2.508717663 | 0.00015816  | 0.002180283 | 0      | 0.87  | 0     | 0     | 0 | LA16c-329F2.1 | chr16 | antisense                        |                                                              |  |  |                                 |
| ENSG00000202198.1  | -1.195305547 | 4.573493695  | 1.02E-12    | 1.29E-10    | 127.37 | 72.93 | 48.95 | 27.43 | 0 | RN7SK         | chr6  | misc_RNA                         | RNA, 7SK small nuclear                                       |  |  |                                 |
| ENSG00000126266.3  | 2.511535562  | -1.905653919 | 0.00018579  | 0.002503941 | 0.03   | 0.02  | 0.21  | 0.08  | 0 | FFAR1         | chr19 | protein_coding                   | free fatty acid receptor 1                                   |  |  |                                 |
| ENSG00000224786.1  | -2.406028246 | -2.446976841 | 0.008668518 | 0.04710187  | 0.44   | 0.44  | 0.12  | 0     | 0 | CETN4P        | chr4  | unitary_pseudogene               | centrin EF-hand protein 4, pseudogene                        |  |  |                                 |
| ENSG00000225938.1  | -2.537281395 | -1.96500019  | 0.000820481 | 0.008126743 | 0.73   | 0.82  | 0.21  | 0     | 0 | RP4-575N6.4   | chr1  | antisense                        |                                                              |  |  |                                 |
| ENSG00000227210.1  | -3.17329237  | -2.567163822 | 0.00221421  | 0.016979913 | 0.35   | 0.33  | 0.05  | 0     | 0 | AC079145.4    | chr2  | antisense                        |                                                              |  |  |                                 |
| ENSG00000267283.1  | 1.038247711  | -0.700461096 | 0.008889505 | 0.048005514 | 0.24   | 0.89  | 1.21  | 0.86  | 0 | AC005306.3    | chr19 | processed_transcript             |                                                              |  |  |                                 |
| ENSG00000276890.1  | 5.410622832  | -2.99023964  | 0.002223255 | 0.016979913 | 0      | 0     | 0     | 1     | 0 | Metazoa_SRP   | chr3  | misc_RNA                         |                                                              |  |  |                                 |
| ENSG00000244378.1  | -6.014723127 | -2.392632659 | 4.29E-05    | 0.000773691 | 0.09   | 0.11  | 0     | 0     | 0 | RPS2P45       | chr16 | transcribed_processed_pseudogene | ribosomal protein S2 pseudogene 45                           |  |  |                                 |
| ENSG00000206341.7  | -1.236211785 | 0.555964152  | 9.59E-06    | 0.000224398 | 2.11   | 1.42  | 0.73  | 0.57  | 0 | HLA-H         | chr6  | unprocessed_pseudogene           | major histocompatibility complex, class I, H (pseudogene)    |  |  |                                 |
| ENSG00000271237.1  | 6.388324764  | -2.37443784  | 3.25E-06    | 9.05E-05    | 0      | 0     | 0.52  | 0.36  | 0 | RP11-140C5.3  | chr10 | processed_pseudogene             |                                                              |  |  |                                 |
| ENSG00000081248.10 | -5.186692316 | -2.918418303 | 0.004334073 | 0.028324191 | 0.04   | 0     | 0     | 0     | 0 | CACNA1S       | chr1  | protein_coding                   | calcium channel, voltage-dependent, L type, alpha 1S subunit |  |  |                                 |
| ENSG00000279686.1  | 3.633236666  | -1.674619842 | 7.38E-08    | 3.60E-06    | 0.03   | 0.05  | 0.31  | 0.63  | 0 | ECSCR         | chr5  | protein_coding                   | endothelial cell surface expressed chemotaxis and            |  |  |                                 |

|                    |              |              |             |             |       |       |       |      |                |       |                        |  |  |  |  |  |  |  |  |  |  |                                                        |
|--------------------|--------------|--------------|-------------|-------------|-------|-------|-------|------|----------------|-------|------------------------|--|--|--|--|--|--|--|--|--|--|--------------------------------------------------------|
|                    |              |              |             |             |       |       |       |      |                |       |                        |  |  |  |  |  |  |  |  |  |  | apoptosis regulator                                    |
| ENSG00000279649.1  | -5.036234388 | -3.002035067 | 0.008472213 | 0.046592746 | 0.02  | 0.07  | 0     | 0    | RP11-96D1.8    | chr16 | TEC                    |  |  |  |  |  |  |  |  |  |  |                                                        |
| ENSG00000224416.2  | 3.890288737  | -0.865278068 | 2.33E-14    | 3.55E-12    | 0.19  | 0.04  | 1.55  | 1.6  | IFNA22P        | chr9  | unprocessed_pseudogene |  |  |  |  |  |  |  |  |  |  | interferon, alpha 22, pseudogene                       |
| ENSG00000160188.9  | 1.232232145  | -0.452415241 | 0.000508131 | 0.005604127 | 0.32  | 0.27  | 0.54  | 0.68 | RSPH1          | chr21 | protein_coding         |  |  |  |  |  |  |  |  |  |  | radial spoke head 1 homolog (Chlamydomonas)            |
| ENSG00000274012.1  | -1.759881757 | 3.053308781  | 2.13E-20    | 6.57E-18    | 52.58 | 31.58 | 14.05 | 7.54 | Metazoa_SRP    | chr14 | misc_RNA               |  |  |  |  |  |  |  |  |  |  |                                                        |
| ENSG00000249395.2  | -1.98477052  | -1.098605127 | 7.61E-05    | 0.001226711 | 0.74  | 0.33  | 0.2   | 0.03 | CASC9          | chr8  | lincRNA                |  |  |  |  |  |  |  |  |  |  | cancer susceptibility candidate 9 (non-protein coding) |
| ENSG00000213886.3  | -1.180380696 | -0.412646301 | 0.001339122 | 0.011593841 | 0.99  | 0.73  | 0.37  | 0.29 | UBD            | chr6  | protein_coding         |  |  |  |  |  |  |  |  |  |  | ubiquitin D                                            |
| ENSG00000132141.13 | 1.333313129  | -0.823085085 | 0.001342165 | 0.011604924 | 0.23  | 0.09  | 0.41  | 0.3  | CCT6B          | chr17 | protein_coding         |  |  |  |  |  |  |  |  |  |  | chaperonin containing TCP1, subunit 6B (zeta 2)        |
| ENSG00000267980.1  | -2.741455216 | -2.234552378 | 0.000982727 | 0.009290055 | 0.32  | 0.34  | 0.08  | 0    | AC007292.6     | chr19 | antisense              |  |  |  |  |  |  |  |  |  |  |                                                        |
| ENSG00000261172.1  | -5.754835002 | -2.568965058 | 0.000305021 | 0.003673222 | 0.08  | 0.32  | 0     | 0    | RP11-356C4.5   | chr16 | lincRNA                |  |  |  |  |  |  |  |  |  |  |                                                        |
| ENSG00000267213.4  | -1.690945941 | -0.577659936 | 4.23E-05    | 0.000773691 | 0.94  | 0.89  | 0.12  | 0.39 | AC007773.2     | chr19 | antisense              |  |  |  |  |  |  |  |  |  |  |                                                        |
| ENSG00000255408.3  | 5.056889643  | -3.172374913 | 0.008472213 | 0.046592746 | 0     | 0     | 0     | 0.03 | PCDHA3         | chr5  | protein_coding         |  |  |  |  |  |  |  |  |  |  | protocadherin alpha 3                                  |
| ENSG00000227028.6  | 5.056889643  | -3.172374913 | 0.008472213 | 0.046592746 | 0     | 0     | 0     | 0.06 | SLC8A1-AS1     | chr2  | antisense              |  |  |  |  |  |  |  |  |  |  | SLC8A1 antisense RNA 1                                 |
| ENSG00000279088.1  | -1.096988469 | 1.557189342  | 8.51E-07    | 3.02E-05    | 2.77  | 3.49  | 1.84  | 0.69 | RP11-574K11.24 | chr10 | TEC                    |  |  |  |  |  |  |  |  |  |  |                                                        |
| ENSG00000132874.13 | 5.557968412  | -2.907744202 | 0.001143578 | 0.010265309 | 0     | 0     | 0.01  | 0.05 | SLC14A2        | chr18 | protein_coding         |  |  |  |  |  |  |  |  |  |  | solute carrier family 14 (urea transporter), member 2  |

|                    |              |              |             |             |       |      |       |      |               |       |                                  |                                                  |
|--------------------|--------------|--------------|-------------|-------------|-------|------|-------|------|---------------|-------|----------------------------------|--------------------------------------------------|
| ENSG00000223711.1  | 1.989046624  | -1.867154617 | 0.002199953 | 0.016979913 | 0     | 0.22 | 0.46  | 0.35 | AC091633.3    | chr3  | antisense                        |                                                  |
| ENSG00000100626.16 | -2.813351479 | -2.185805038 | 0.002010241 | 0.016171467 | 0.04  | 0.04 | 0     | 0    | GALNT16       | chr14 | protein_coding                   | polypeptide N-acetylgalactosaminyltransferase 16 |
| ENSG00000241959.3  | 5.24452133   | -3.078482142 | 0.004334073 | 0.028324191 | 0     | 0    | 0     | 0.87 | RN7SL76P      | chr7  | misc_RNA                         | RNA, 7SL, cytoplasmic 76, pseudogene             |
| ENSG00000227536.1  | 2.913595433  | -2.5540114   | 0.005060939 | 0.032002387 | 0.03  | 0    | 0.11  | 0.14 | SOCS5P4       | chrX  | processed_pseudogene             | suppressor of cytokine signaling 5 pseudogene 4  |
| ENSG00000259933.6  | 2.315198398  | 0.261715808  | 7.34E-14    | 1.04E-11    | 0.59  | 1.01 | 3.09  | 3.97 | RP11-304L19.1 | chr16 | sense_overlapping                |                                                  |
| ENSG00000239257.1  | 2.383850723  | -1.987386316 | 0.000501584 | 0.005548178 | 0.29  | 0    | 0.73  | 0.6  | RPL23AP1      | chr6  | transcribed_processed_pseudogene | ribosomal protein L23a pseudogene 1              |
| ENSG00000197599.12 | 2.785310657  | 0.170075365  | 1.20E-16    | 2.47E-14    | 0.17  | 0.06 | 0.68  | 0.68 | CCDC154       | chr16 | protein_coding                   | coiled-coil domain containing 154                |
| ENSG00000213830.3  | -1.096303964 | -0.468116742 | 0.002894424 | 0.021063952 | 2.04  | 1.48 | 0.74  | 0.69 | CFL1P5        | chr5  | processed_pseudogene             | cofilin 1 (non-muscle) pseudogene 5              |
| ENSG00000237412.6  | -3.170190653 | -2.5680532   | 0.00221421  | 0.016979913 | 0.015 | 0.1  | 0     | 0.01 | PRSS56        | chr2  | protein_coding                   | protease, serine, 56                             |
| ENSG00000264672.5  | -2.406766414 | -2.446561598 | 0.008668518 | 0.04710187  | 0.17  | 0.1  | 0.04  | 0    | SEPT4-AS1     | chr17 | antisense                        | SEPT4 antisense RNA 1                            |
| ENSG00000196152.10 | 1.081980527  | 4.388761824  | 1.20E-10    | 1.10E-08    | 5.91  | 5.87 | 11.13 | 10.7 | ZNF79         | chr9  | protein_coding                   | zinc finger protein 79                           |
| ENSG00000254459.1  | -2.955643382 | -2.697538561 | 0.007234971 | 0.042343871 | 0.28  | 0.26 | 0.05  | 0    | RP11-91P24.7  | chr11 | antisense                        |                                                  |
| ENSG00000274897.2  | -1.18887143  | -0.92613224  | 0.008740673 | 0.047395965 | 0.24  | 0.5  | 0.08  | 0.21 | PANO1         | chr11 | protein_coding                   | proapoptotic nucleolar protein 1                 |
| ENSG00000131067.16 | 2.622252657  | -2.073463775 | 0.000252727 | 0.003208238 | 0.02  | 0.02 | 0.06  | 0.17 | GGT7          | chr20 | protein_coding                   | gamma-glutamyltransferase 7                      |
| ENSG00000223711.1  | -6.01        | -2.39        | 4.29        | 0.00        | 0     | 0.0  | 0     | 0    | C1orf22       | chr1  | lincRNA                          | chromosome 1 open                                |

|               |       |       |      |      |    |     |      |      |               |       |                      |                                             |  |  |                   |
|---------------|-------|-------|------|------|----|-----|------|------|---------------|-------|----------------------|---------------------------------------------|--|--|-------------------|
| 0002219       | 6902  | 1392  | E-05 | 0773 | 17 | 5   |      |      | 9             |       |                      |                                             |  |  | reading frame 229 |
| 53.5          | 832   | 426   |      | 691  |    |     |      |      |               |       |                      |                                             |  |  |                   |
| ENSG000001559 | 3.580 | -0.69 | 2.32 | 3.55 | 0. | 0   | 0.21 | 0.13 | KIF5A         | chr12 | protein_coding       | kinesin family member 5A                    |  |  |                   |
| 80.11         | 7226  | 7625  | E-14 | E-12 | 03 |     |      |      |               |       |                      |                                             |  |  |                   |
| ENSG000002015 | 3.746 | -2.61 | 0.00 | 0.01 | 0. | 0   | 0.87 | 1.53 | RNVU1-6       | chr1  | snRNA                | RNA, variant U1 small nuclear 6             |  |  |                   |
| 58.1          | 1693  | 7406  | 1221 | 0739 | 16 |     |      |      |               |       |                      |                                             |  |  |                   |
| ENSG000001154 | -1.00 | -0.33 | 0.00 | 0.02 | 0. | 0.6 | 0.35 | 0.08 | PECR          | chr2  | protein_coding       | peroxisomal trans-2-enoyl-CoA reductase     |  |  |                   |
| 25.13         | 1294  | 3833  | 3801 | 6113 | 41 | 2   |      |      |               |       |                      |                                             |  |  |                   |
| ENSG000001807 | 2.394 | -2.49 | 0.00 | 0.02 | 0. | 0   | 0    | 0.07 | WDFY3-AS2     | chr4  | processed_transcript | WDFY3 antisense RNA 2                       |  |  |                   |
| 69.8          | 1805  | 0775  | 2941 | 1287 | 01 |     |      |      |               |       |                      |                                             |  |  |                   |
| ENSG000002795 | -2.90 | -1.70 | 4.12 | 0.00 | 0. | 0.1 | 0.04 | 0    | AC006486.10   | chr19 | TEC                  |                                             |  |  |                   |
| 39.1          | 3942  | 4089  | E-05 | 0758 | 22 | 5   |      |      |               |       |                      |                                             |  |  |                   |
| ENSG000002137 | -1.44 | 0.738 | 1.22 | 5.57 | 0. | 0.5 | 0.15 | 0.14 | ZNF337-AS1    | chr20 | antisense            | ZNF337 antisense RNA 1                      |  |  |                   |
| 42.6          | 8857  | 5497  | E-07 | E-06 | 34 | 5   |      |      |               |       |                      |                                             |  |  |                   |
| ENSG000001877 | 2.558 | 2.795 | 6.76 | 6.36 | 0. | 0.9 | 5.86 | 4.14 | CARD9         | chr9  | protein_coding       | caspase recruitment domain family, member 9 |  |  |                   |
| 96.13         | 3394  | 9363  | E-37 | E-34 | 99 | 5   |      |      |               |       |                      |                                             |  |  |                   |
| ENSG000001715 | -5.03 | -3.00 | 0.00 | 0.04 | 0. | 0   | 0    | 0    | OTP           | chr5  | protein_coding       | orthopedia homeobox                         |  |  |                   |
| 40.7          | 8905  | 0539  | 8472 | 6592 | 07 |     |      |      |               |       |                      |                                             |  |  |                   |
| ENSG000002259 | 5.056 | -3.17 | 0.00 | 0.04 | 0  | 0   | 0    | 0.52 | RP3-441A12.1  | chr6  | antisense            |                                             |  |  |                   |
| 45.1          | 8896  | 2374  | 8472 | 6592 | 0  | 0   |      |      |               |       |                      |                                             |  |  |                   |
| ENSG000001841 | -3.94 | -1.34 | 1.76 | 1.01 | 0. | 0.1 | 0.01 | 0    | GPR173        | chrX  | protein_coding       | G protein-coupled receptor 173              |  |  |                   |
| 94.5          | 2431  | 6632  | E-08 | E-06 | 16 |     |      |      |               |       |                      |                                             |  |  |                   |
| ENSG000002745 | 5.815 | -2.75 | 0.00 | 0.00 | 0  | 0   | 0.37 | 0.82 | Metazoa_SRP   | chr11 | misc_RNA             |                                             |  |  |                   |
| 89.1          | 0679  | 4937  | 0305 | 3673 | 0  | 0   |      |      |               |       |                      |                                             |  |  |                   |
| ENSG000002043 | 1.669 | 7.303 | 9.00 | 4.23 | 29 | 30. | 84.3 | 83.7 | HSPA1B        | chr6  | protein_coding       | heat shock 70kDa protein 1B                 |  |  |                   |
| 88.6          | 7872  | 1010  | E-25 | E-22 | .5 | 81  | 7    | 5    |               |       |                      |                                             |  |  |                   |
| ENSG000002726 | 1.340 | -0.88 | 0.00 | 0.00 | 0. | 0.1 | 0.16 | 0.27 | RP11-344N10.5 | chr10 | lincRNA              |                                             |  |  |                   |
| 30.1          | 6755  | 0272  | 0880 | 8579 | 06 | 3   |      |      |               |       |                      |                                             |  |  |                   |
| ENSG000002270 | 1.330 | 0.347 | 3.13 | 8.96 | 2. | 2.8 | 4.47 | 8.13 | RP11-543P15.1 | chr12 | processed_pseudogene |                                             |  |  |                   |
| 0002270       | 3336  | 4423  | E-06 | E-05 | 85 |     |      |      |               |       |                      |                                             |  |  |                   |





|                    |              |              |             |             |      |      |      |      |                 |       |                                    |                                                  |
|--------------------|--------------|--------------|-------------|-------------|------|------|------|------|-----------------|-------|------------------------------------|--------------------------------------------------|
| ENSG00000186409.14 | -2.307094515 | -2.506168532 | 0.008668518 | 0.04710187  | 0.02 | 0.07 | 0.01 | 0    | CCDC30          | chr1  | protein_coding                     | coiled-coil domain containing 30                 |
| ENSG00000228526.3  | 4.220239891  | -1.206198421 | 6.55E-12    | 7.40E-10    | 0    | 0.19 | 2.37 | 1    | RP3-510D11.1    | chr1  | lincRNA                            |                                                  |
| ENSG00000228801.5  | -1.83494399  | -0.189654332 | 2.20E-07    | 9.33E-06    | 0.91 | 0.5  | 0.28 | 0.05 | RP11-110G21.1   | chr8  | antisense                          |                                                  |
| ENSG00000132821.11 | -5.658860247 | -2.631724583 | 0.000305021 | 0.003673222 | 0.1  | 0.09 | 0    | 0    | VSTM2L          | chr20 | protein_coding                     | V-set and transmembrane domain containing 2 like |
| ENSG00000256196.1  | -5.185932949 | -2.918844076 | 0.004334073 | 0.028324191 | 0.25 | 0.06 | 0    | 0    | RP11-881M11.4   | chr11 | antisense                          |                                                  |
| ENSG00000162599.15 | -1.012699448 | 3.114004135  | 2.66E-08    | 1.45E-06    | 1.08 | 1.15 | 0.65 | 0.31 | NFIA            | chr1  | protein_coding                     | nuclear factor I/A                               |
| ENSG00000248275.1  | -1.486905869 | -1.315374437 | 0.004374631 | 0.028477089 | 0.28 | 0.64 | 0.19 | 0.09 | TRIM52-AS1      | chr5  | processed_transcript               | TRIM52 antisense RNA 1 (head to head)            |
| ENSG00000259424.1  | -5.185173935 | -2.919269738 | 0.004334073 | 0.028324191 | 0.48 | 0.31 | 0    | 0    | RP11-35O15.1    | chr15 | antisense                          |                                                  |
| ENSG00000179841.8  | 1.549915456  | 0.815147543  | 1.81E-09    | 1.32E-07    | 0.1  | 0.14 | 0.34 | 0.27 | AKAP5           | chr14 | protein_coding                     | A kinase (PRKA) anchor protein 5                 |
| ENSG00000104863.11 | -1.276317292 | 0.034932398  | 9.35E-05    | 0.001439589 | 1.94 | 1.42 | 0.68 | 0.52 | LIN7B           | chr19 | protein_coding                     | lin-7 homolog B (C. elegans)                     |
| ENSG00000220891.1  | 3.511929849  | -2.754967938 | 0.004007345 | 0.027138454 | 0.01 | 0    | 0.01 | 0.1  | LL22NC03-63E9.3 | chr22 | antisense                          |                                                  |
| ENSG00000224046.1  | -1.953673222 | -1.603889072 | 0.000908163 | 0.008751665 | 0.53 | 0.3  | 0.22 | 0    | AC005076.5      | chr7  | antisense                          |                                                  |
| ENSG00000227234.1  | 1.326793746  | -0.479874294 | 0.000195736 | 0.002606213 | 0.98 | 0.71 | 1.4  | 2.34 | SPANXB1         | chrX  | protein_coding                     | SPANX family, member B1                          |
| ENSG00000262587.2  | -2.024263139 | -2.004972134 | 0.005507409 | 0.034137494 | 0.31 | 0.2  | 0.1  | 0    | RP11-266L9.4    | chr16 | transcribed_unprocessed_pseudogene |                                                  |

|                    |              |              |             |             |      |      |       |      |               |       |                                    |                                                                        |
|--------------------|--------------|--------------|-------------|-------------|------|------|-------|------|---------------|-------|------------------------------------|------------------------------------------------------------------------|
| ENSG00000198028.3  | 5.241148358  | -3.07997191  | 0.004334073 | 0.028324191 | 0    | 0    | 0.04  | 0.05 | ZNF560        | chr19 | protein_coding                     | zinc finger protein 560                                                |
| ENSG00000230666.5  | 4.684094243  | -1.980290798 | 2.10E-08    | 1.18E-06    | 0    | 0.01 | 0.04  | 0.21 | CEACAM22P     | chr19 | transcribed_unprocessed_pseudogene | carcinoembryonic antigen-related cell adhesion molecule 22, pseudogene |
| ENSG00000256128.5  | 4.277511936  | -2.270056716 | 3.39E-05    | 0.0006418   | 0    | 0.02 | 0.36  | 0    | LINC00944     | chr12 | lincRNA                            | long intergenic non-protein coding RNA 944                             |
| ENSG00000229721.3  | 5.237782528  | -3.081460244 | 0.008472213 | 0.046592746 | 0    | 0    | 0.37  | 0    | RP11-252i14.1 | chr5  | processed_pseudogene               |                                                                        |
| ENSG00000183484.11 | 2.429452     | -0.817435716 | 1.67E-08    | 9.65E-07    | 0.03 | 0.06 | 0.29  | 0.13 | GPR132        | chr14 | protein_coding                     | G protein-coupled receptor 132                                         |
| ENSG00000229931.1  | 1.345493677  | -0.013773787 | 1.83E-05    | 0.000385318 | 1.26 | 0.99 | 1.8   | 3.26 | RP1-151F17.1  | chr6  | antisense                          |                                                                        |
| ENSG00000181126.13 | -2.244209198 | -1.398490776 | 6.52E-05    | 0.001087748 | 0.08 | 0.1  | 0.03  | 0    | HLA-V         | chr6  | transcribed_unprocessed_pseudogene | major histocompatibility complex, class I, V (pseudogene)              |
| ENSG00000241316.6  | 1.559465446  | -0.626771468 | 4.23E-05    | 0.000773691 | 0.1  | 0.13 | 0.38  | 0.19 | SUCLG2-AS1    | chr3  | lincRNA                            | SUCLG2 antisense RNA 1 (head to head)                                  |
| ENSG00000166428.12 | 3.740022019  | -2.620561511 | 0.001221239 | 0.010739157 | 0    | 0    | 0.06  | 0    | PLD4          | chr14 | protein_coding                     | phospholipase D family, member 4                                       |
| ENSG00000273079.4  | -2.404921584 | -2.447599518 | 0.008668518 | 0.04710187  | 0    | 0.01 | 0     | 0    | GRIN2B        | chr12 | protein_coding                     | glutamate receptor, ionotropic, N-methyl D-aspartate 2B                |
| ENSG00000229127.1  | -5.552830658 | -2.6991417   | 0.000589815 | 0.006205402 | 0.04 | 0.12 | 0     | 0    | AC007038.7    | chr2  | antisense                          |                                                                        |
| ENSG00000117013.14 | 2.248151205  | 1.220266806  | 2.66E-19    | 7.01E-17    | 0.29 | 0.12 | 1.03  | 0.65 | KCNQ4         | chr1  | protein_coding                     | potassium channel, voltage gated KQT-like subfamily Q, member 4        |
| ENSG00000173334.3  | 1.269327478  | 5.441567614  | 9.97E-15    | 1.56E-12    | 6.93 | 6.21 | 15.13 | 12.6 | TRIB1         | chr8  | protein_coding                     | tribbles pseudokinase 1                                                |
| ENSG00000173334.3  | 7.208        | -1.74        | 2.88        | 2.50        | 0    | 0    | 0.23  | 0.14 | C6orf25       | chr6  | protein_coding                     | chromosome 6 open                                                      |



|                    |              |              |             |             |       |       |       |       |  |                |       |                      |                                                |
|--------------------|--------------|--------------|-------------|-------------|-------|-------|-------|-------|--|----------------|-------|----------------------|------------------------------------------------|
| ENSG00000269068.1  | 5.403084031  | -2.9935843   | 0.002223255 | 0.016979913 |       |       |       | 0.470 |  | RP11-256I23.2  | chr2  | antisense            |                                                |
| ENSG00000181029.8  | 1.437781826  | -0.243558636 | 2.03E-05    | 0.000419168 | 0.05  | 0.1   | 0.18  | 0.2   |  | TRAPPC5        | chr19 | protein_coding       | trafficking protein particle complex 5         |
| ENSG00000235888.1  | 2.440503103  | -1.75171463  | 8.21E-05    | 0.001293661 | 0.02  | 0.09  | 0.3   | 0.24  |  | AF064858.8     | chr21 | lincRNA              |                                                |
| ENSG00000270175.1  | -1.430983166 | -1.480865287 | 0.007831547 | 0.044897576 | 0.42  | 0.66  | 0.33  | 0     |  | RP11-793H13.11 | chr12 | antisense            |                                                |
| ENSG00000155026.16 | 4.561798143  | -2.070294219 | 7.29E-08    | 3.57E-06    | 0     | 0.01  | 0.05  | 0.13  |  | RSPH10B        | chr7  | protein_coding       | radial spoke head 10 homolog B (Chlamydomonas) |
| ENSG00000158764.6  | 5.403084031  | -2.9935843   | 0.002223255 | 0.016979913 | 0     | 0     | 0.22  | 0     |  | ITLN2          | chr1  | protein_coding       | intelectin 2                                   |
| ENSG00000229220.1  | 5.559637807  | -2.907001505 | 0.001143578 | 0.010265309 | 0     | 0     | 0     | 0.42  |  | RP11-47A17.2   | chr1  | processed_pseudogene |                                                |
| ENSG00000186834.3  | 1.421777943  | 7.405816909  | 1.20E-18    | 2.95E-16    | 24.98 | 26.56 | 62.14 | 58.83 |  | HEXIM1         | chr17 | protein_coding       | hexamethylene bis-acetamide inducible 1        |
| ENSG00000171988.17 | 1.136084306  | 5.632569552  | 3.16E-12    | 3.74E-10    | 3.48  | 3.42  | 7.18  | 6.08  |  | JMJD1C         | chr10 | protein_coding       | jumonji domain containing 1C                   |
| ENSG00000275092.1  | -1.712361071 | 0.125602052  | 1.45E-07    | 6.42E-06    | 1.79  | 2.41  | 0.51  | 0.61  |  | LA16c-329F2.2  | chr16 | sense_intronic       |                                                |
| ENSG00000130643.8  | 1.855086944  | -1.317337691 | 0.000168669 | 0.002302864 | 0.06  | 0.04  | 0.2   | 0.14  |  | CALY           | chr10 | protein_coding       | calcyon neuron-specific vesicular protein      |
| ENSG00000273151.1  | 1.445006751  | -0.644698222 | 0.000196155 | 0.002610472 | 0.06  | 0.04  | 0.16  | 0.07  |  | RP11-449P15.2  | chr7  | antisense            |                                                |
| ENSG00000225166.1  | -5.318126098 | -2.842238888 | 0.002223255 | 0.016979913 | 0.13  | 0.22  | 0     | 0     |  | AC012462.2     | chr2  | lincRNA              |                                                |
| ENSG00000172548.14 | 2.858599812  | -2.215351436 | 0.000186294 | 0.002504551 | 0     | 0.02  | 0.02  | 0.15  |  | NIPAL4         | chr5  | protein_coding       | NIPA-like domain containing 4                  |
| ENSG00000172548.14 | -1.68        | -0.67        | 6.41        | 0.00        | 0     | 0.4   | 0.22  | 0.12  |  | CTB-31         | chr19 | lincRNA              |                                                |

|                          |                      |                      |                     |                     |    |           |      |      |                   |       |                      |                                                                        |
|--------------------------|----------------------|----------------------|---------------------|---------------------|----|-----------|------|------|-------------------|-------|----------------------|------------------------------------------------------------------------|
| 0002615<br>26.2          | 1393<br>574          | 4073<br>736          | E-05<br>919         | 1075<br>919         | 87 | 1         |      |      | O20.2             |       |                      |                                                                        |
| ENSG000001668<br>63.11   | 1.035<br>7071<br>92  | -0.34<br>3652<br>624 | 0.00<br>2363<br>88  | 0.01<br>7891<br>052 | 0. | 0.5<br>21 | 0.72 | 0.7  | TAC3              | chr12 | protein_coding       | tachykinin 3                                                           |
| ENSG000002607<br>25.1    | 5.551<br>3078<br>98  | -2.91<br>0711<br>459 | 0.00<br>1143<br>578 | 0.01<br>0265<br>309 | 0  | 0         | 0.18 | 0    | AC0053<br>07.1    | chr19 | lincRNA              |                                                                        |
| ENSG000002788<br>40.1    | -5.18<br>4415<br>275 | -2.91<br>9695<br>291 | 0.00<br>4334<br>073 | 0.02<br>8324<br>191 | 0. | 0.4<br>32 | 0    | 0    | RP11-3<br>45N11.1 | chr15 | sense_intronic       |                                                                        |
| ENSG000001433<br>44.15   | 1.878<br>3203<br>41  | -0.06<br>3767<br>945 | 1.02<br>E-08        | 6.25<br>E-07        | 0. | 0.0<br>1  | 0.21 | 0.29 | RGL1              | chr1  | protein_coding       | ral guanine nucleotide dissociation stimulator-like 1                  |
| ENSG000000033<br>93.14   | 1.127<br>6219<br>4   | 4.296<br>9378<br>07  | 2.87<br>E-11        | 2.93<br>E-09        | 1. | 1.4<br>61 | 3.03 | 2.88 | ALS2              | chr2  | protein_coding       | amyotrophic lateral sclerosis 2 (juvenile)                             |
| ENSG000002558<br>93.1    | -1.75<br>8116<br>671 | -1.01<br>4128<br>203 | 0.00<br>0158<br>2   | 0.00<br>2180<br>283 | 0. | 1.3<br>83 | 0.54 | 0    | RP11-6<br>85N10.1 | chr11 | antisense            |                                                                        |
| ENSG000001245<br>57.12   | 5.312<br>3413<br>4   | -1.47<br>9682<br>693 | 2.45<br>E-12        | 2.98<br>E-10        | 0. | 0.0<br>1  | 0.23 | 0.17 | BTN1A1            | chr6  | protein_coding       | butyrophilin, subfamily 1, member A1                                   |
| ENSG000001984<br>82.10   | 1.026<br>4951<br>4   | 1.973<br>5408<br>61  | 6.01<br>E-07        | 2.22<br>E-05        | 0. | 0.6<br>62 | 1.31 | 1    | ZNF808            | chr19 | protein_coding       | zinc finger protein 808                                                |
| ENSG000001715<br>17.5    | 5.244<br>5213<br>3   | -3.07<br>8482<br>142 | 0.00<br>4334<br>073 | 0.02<br>8324<br>191 | 0  | 0         | 0    | 0.07 | LPAR3             | chr1  | protein_coding       | lysophosphatidic acid receptor 3                                       |
| ENSG000002672<br>87.1    | 6.034<br>6274<br>28  | -2.61<br>5903<br>018 | 4.29<br>E-05        | 0.00<br>0773<br>691 | 0  | 0         | 0.03 | 0.08 | RP11-5<br>67M16.1 | chr18 | processed_transcript |                                                                        |
| ENSG000002385<br>78.1    | -2.81<br>3710<br>746 | -2.18<br>5601<br>073 | 0.00<br>2010<br>241 | 0.01<br>6171<br>467 | 3. | 3.5<br>74 | 0.4  | 0.44 | SNORD<br>4A       | chr17 | snoRNA               | small nucleolar RNA, C/D box 4A                                        |
| ENSG000001591<br>97.3    | 1.709<br>8824<br>49  | -1.31<br>3919<br>395 | 0.00<br>0530<br>386 | 0.00<br>5810<br>639 | 0. | 0.1<br>15 | 0.19 | 0.78 | KCNE2             | chr21 | protein_coding       | potassium channel, voltage gated subfamily E regulatory beta subunit 2 |
| ENSG000001575<br>0001575 | -2.35<br>6887        | -0.16<br>1492        | 3.56<br>E-10        | 3.02<br>E-08        | 0. | 0.2<br>22 | 0.06 | 0.02 | ERG               | chr21 | protein_coding       | v-ets avian erythroblastosis virus                                     |

|                    |           |           |          |          |      |        |      |      |                 |       |                        |                                                                                   |                      |
|--------------------|-----------|-----------|----------|----------|------|--------|------|------|-----------------|-------|------------------------|-----------------------------------------------------------------------------------|----------------------|
| 54.18              | 108       | 416       |          |          |      |        |      |      |                 |       |                        |                                                                                   | E26 oncogene homolog |
| ENSG00000259556.2  | 5.0534984 | -3.173867 | 0.008472 | 0.046592 | 0    | 0      | 0.11 | 0.09 | RP11-56B16.2    | chr15 | unprocessed_pseudogene |                                                                                   |                      |
| ENSG00000121101.15 | 1.2642439 | 1.8176025 | 2.48E-09 | 1.78E-07 | 0.41 | 0.43   | 0.84 | 0.95 | TEX14           | chr17 | protein_coding         | testis expressed 14                                                               |                      |
| ENSG00000254038.1  | 1.2579096 | -1.113456 | 0.003851 | 0.026364 | 0.63 | 0.16   | 0.13 | 1.57 | RP11-419C23.1   | chr8  | lincRNA                |                                                                                   |                      |
| ENSG00000258555.4  | 1.0442297 | 0.5018160 | 0.000124 | 0.001824 | 0.15 | 0.15   | 0.25 | 0.29 | SPECC1L-ADORA2A | chr22 | protein_coding         | SPECC1L-ADORA2A readthrough (NMD candidate)                                       |                      |
| ENSG00000066230.10 | 1.1249910 | 0.3382157 | 7.13E-05 | 0.001163 | 0.31 | 0.3983 | 0.63 | 0.54 | SLC9A3          | chr5  | protein_coding         | solute carrier family 9, subfamily A (NHE3, cation proton antiporter 3), member 3 |                      |
| ENSG00000238113.6  | 3.7428928 | -2.618878 | 0.001221 | 0.010739 | 0.01 | 0      | 0.09 | 0.04 | LINC01410       | chr9  | lincRNA                | long intergenic non-protein coding RNA 1410                                       |                      |
| ENSG00000273056.1  | -5.184794 | -2.919482 | 0.004334 | 0.028324 | 0.23 | 0.22   | 0    | 0    | RP11-77E14.2    | chr9  | lincRNA                |                                                                                   |                      |
| ENSG00000213513.3  | 1.4125994 | -0.257887 | 3.57E-05 | 0.000670 | 0.26 | 0.3584 | 0.74 | 0.61 | RP13-39P12.2    | chr10 | processed_pseudogene   |                                                                                   |                      |
| ENSG00000231133.6  | -2.955643 | -2.697538 | 0.007234 | 0.042343 | 0.21 | 0.21   | 0.04 | 0    | HAR1B           | chr20 | lincRNA                | highly accelerated region 1B (non-protein coding)                                 |                      |
| ENSG00000165457.13 | 3.7653051 | 0.9573830 | 1.78E-35 | 1.52E-32 | 0.1  | 0.31   | 1.81 | 3.3  | FOLR2           | chr11 | protein_coding         | folate receptor 2 (fetal)                                                         |                      |
| ENSG00000185958.9  | 5.6889572 | -2.830820 | 0.000589 | 0.006205 | 0    | 0      | 0.02 | 0.02 | FAM186A         | chr12 | protein_coding         | family with sequence similarity 186, member A                                     |                      |
| ENSG00000206337.10 | -1.446437 | 1.7983509 | 5.08E-11 | 4.97E-09 | 2.09 | 1.61   | 0.72 | 0.46 | HCP5            | chr6  | sense_overlapping      | HLA complex P5 (non-protein coding)                                               |                      |
| ENSG00000238273.3  | -2.421980 | -1.077775 | 3.74E-06 | 0.00101  | 0.31 | 0.2862 | 0.03 | 0.05 | AC012360.6      | chr2  | antisense              |                                                                                   |                      |

|                    |              |              |             |             |      |      |      |      |               |       |                       |                                                                                                                |
|--------------------|--------------|--------------|-------------|-------------|------|------|------|------|---------------|-------|-----------------------|----------------------------------------------------------------------------------------------------------------|
| ENSG00000205334.2  | -2.956018572 | -2.697328003 | 0.007234971 | 0.042343871 | 0.07 | 0.04 | 0.01 | 0    | LINC01460     | chr2  | lincRNA               | long intergenic non-protein coding RNA 1460                                                                    |
| ENSG00000214465.3  | 7.377959605  | -1.606718138 | 4.75E-11    | 4.67E-09    | 0    | 0    | 0.54 | 0.34 | SMARCE1P6     | chr2  | processed_pseudo_gene | SWI/SNF related, matrix associated, actin dependent regulator of chromatin, subfamily e, member 1 pseudogene 6 |
| ENSG00000236255.1  | 1.352786939  | 0.260843665  | 3.70E-06    | 0.00101299  | 0.19 | 0.14 | 0.46 | 0.28 | AC009404.2    | chr2  | lincRNA               |                                                                                                                |
| ENSG00000165698.15 | -1.052745665 | 2.116182363  | 2.80E-07    | 1.14E-05    | 1.97 | 2.07 | 0.99 | 0.71 | C9orf9        | chr9  | protein_coding        | chromosome 9 open reading frame 9                                                                              |
| ENSG00000102387.15 | 1.493121809  | -1.269444272 | 0.002781217 | 0.020380053 | 0.06 | 0.08 | 0.28 | 0.07 | TAF7L         | chrX  | protein_coding        | TAF7-like RNA polymerase II, TATA box binding protein (TBP)-associated factor, 50kDa                           |
| ENSG00000238287.1  | 1.986338095  | -1.866506308 | 0.002199953 | 0.016979913 | 0.22 | 0.08 | 0.66 | 0.42 | RP11-656D10.3 | chr1  | antisense             |                                                                                                                |
| ENSG00000150201.14 | 1.42061186   | -1.583478876 | 0.007831547 | 0.044897576 | 0.13 | 0.25 | 0.34 | 0.57 | FXD4          | chr10 | protein_coding        | FXD domain containing ion transport regulator 4                                                                |
| ENSG00000076641.4  | 1.406287455  | -0.303488739 | 3.79E-05    | 0.00704709  | 0.04 | 0.04 | 0.04 | 0.15 | PAG1          | chr8  | protein_coding        | phosphoprotein membrane anchor with glycosphingolipid microdomains 1                                           |
| ENSG00000108771.12 | 3.480655751  | 0.136234979  | 3.15E-22    | 1.15E-19    | 0.05 | 0.09 | 0.63 | 0.77 | DHX58         | chr17 | protein_coding        | DEXH (Asp-Glu-X-His) box polypeptide 58                                                                        |
| ENSG00000255449.1  | -3.4489117   | -2.391262324 | 0.000672711 | 0.006880458 | 0.38 | 0.25 | 0.04 | 0    | RP11-91P24.6  | chr11 | antisense             |                                                                                                                |
| ENSG00000274678.1  | 8.408580205  | -0.693479633 | 3.36E-21    | 1.15E-18    | 0    | 0    | 2.65 | 1.32 | RP11-2C24.7   | chr16 | lincRNA               |                                                                                                                |
| ENSG00000272109.53 | 1.4160953    | -1.317097    | 0.003915    | 0.026702    | 0.29 | 0.41 | 0.45 | 1.23 | HIST2H2AA4    | chr1  | protein_coding        | histone cluster 2, H2aa4                                                                                       |







|                    |              |              |             |             |       |      |      |      |                |       |                |                                                                        |
|--------------------|--------------|--------------|-------------|-------------|-------|------|------|------|----------------|-------|----------------|------------------------------------------------------------------------|
| ENSG00000164318.17 | -5.03699703  | -3.001608012 | 0.008472213 | 0.046592746 | 0.02  | 0.03 | 0    | 0    | EGFLAM         | chr5  | protein_coding | EGF-like, fibronectin type III and laminin G domains                   |
| ENSG00000136881.11 | 6.38593589   | -2.375534796 | 3.25E-06    | 9.05E-05    | 0     | 0    | 0.12 | 0.04 | BAAT           | chr9  | protein_coding | bile acid CoA:amino acid N-acyltransferase                             |
| ENSG00000234693.1  | -3.174405904 | -2.566536669 | 0.00221421  | 0.016979913 | 0.28  | 0.11 | 0.03 | 0    | RP4-530115.6   | chr20 | antisense      |                                                                        |
| ENSG00000057149.14 | -5.319635181 | -2.841390876 | 0.002223255 | 0.016979913 | 0.11  | 0.04 | 0    | 0    | SERPINB3       | chr18 | protein_coding | serpin peptidase inhibitor, clade B (ovalbumin), member 3              |
| ENSG00000275248.1  | 5.056889643  | -3.172374913 | 0.008472213 | 0.046592746 | 0     | 0    | 0    | 0.4  | RP11-40E6.2    | chr13 | lincRNA        |                                                                        |
| ENSG00000178796.12 | 5.054345576  | -3.173494146 | 0.008472213 | 0.046592746 | 0     | 0    | 0.05 | 0.07 | RIIAD1         | chr1  | protein_coding | regulatory subunit of type II PKA R-subunit (RIIa) domain containing 1 |
| ENSG00000167701.13 | 2.848348675  | 0.151619532  | 1.11E-17    | 2.44E-15    | 0.05  | 0.21 | 0.73 | 1    | GPT            | chr8  | protein_coding | glutamic-pyruvate transaminase (alanine aminotransferase)              |
| ENSG00000153495.10 | 1.381251842  | 1.184141552  | 5.13E-09    | 3.39E-07    | 2.16  | 1.44 | 3.45 | 4.79 | TEX29          | chr13 | protein_coding | testis expressed 29                                                    |
| ENSG00000268870.1  | 5.237782528  | -3.081460244 | 0.008472213 | 0.046592746 | 0     | 0    | 0.37 | 0    | CTD-3105H18.16 | chr19 | protein_coding |                                                                        |
| ENSG00000253250.2  | 5.243677416  | -3.078854719 | 0.004334073 | 0.028324191 | 0     | 0    | 0.03 | 0.25 | C8orf88        | chr8  | protein_coding | chromosome 8 open reading frame 88                                     |
| ENSG00000275056.1  | 2.106575127  | -2.379500021 | 0.009133232 | 0.048860845 | 0.07  | 0.02 | 0.31 | 0.06 | RP11-127120.8  | chr16 | sense_intronic |                                                                        |
| ENSG00000279261.1  | -2.538689134 | -1.96419814  | 0.000820481 | 0.008126743 | 0.17  | 0.09 | 0.04 | 0    | PP2672         | chr1  | protein_coding |                                                                        |
| ENSG00000221170.1  | -1.663577565 | -0.870193302 | 0.000145973 | 0.002086002 | 10.35 | 5.33 | 3.13 | 1.04 | MIR1304        | chr11 | miRNA          | microRNA 1304                                                          |
| ENSG000005244      | 5.244        | -3.07        | 0.00        | 0.02        | 0     | 0    | 0    | 0.71 | RP11-1         | chr18 | lincRNA        |                                                                        |

|                    |              |              |             |             |      |      |      |      |  |               |       |                                  |                                                   |  |  |  |  |  |
|--------------------|--------------|--------------|-------------|-------------|------|------|------|------|--|---------------|-------|----------------------------------|---------------------------------------------------|--|--|--|--|--|
| 000266905.1        | 52133        | 8482142      | 4334073     | 8324191     |      |      |      |      |  | 058N17.1      |       |                                  |                                                   |  |  |  |  |  |
| ENSG00000086730.16 | 1.08251191   | 1.616585583  | 6.45E-07    | 2.37E-05    | 0.56 | 0.4  | 0.73 | 1.07 |  | LAT2          | chr7  | protein_coding                   | linker for activation of T cells family, member 2 |  |  |  |  |  |
| ENSG00000219355.2  | -5.184415275 | -2.919695291 | 0.004334073 | 0.028324191 | 0.29 | 0.42 | 0    | 0    |  | RPL31P52      | chr12 | processed_pseudogene             | ribosomal protein L31 pseudogene 52               |  |  |  |  |  |
| ENSG00000100228.12 | -1.032873359 | 1.648252085  | 3.01E-06    | 8.73E-05    | 1.08 | 1.05 | 0.51 | 0.4  |  | RAB36         | chr22 | protein_coding                   | RAB36, member RAS oncogene family                 |  |  |  |  |  |
| ENSG00000260542.1  | 5.053498468  | -3.173867043 | 0.008472213 | 0.046592746 | 0    | 0    | 0.05 | 0.04 |  | RP13-379O24.2 | chr20 | lincRNA                          |                                                   |  |  |  |  |  |
| ENSG00000110693.15 | 3.739622656  | -2.620350427 | 0.001221239 | 0.010739157 | 0    | 0    | 0.04 | 0    |  | SOX6          | chr11 | protein_coding                   | SRY (sex determining region Y)-box 6              |  |  |  |  |  |
| ENSG00000273271.1  | -5.65848923  | -2.631934238 | 0.000305021 | 0.003673222 | 0.31 | 0.39 | 0    | 0    |  | AP000254.8    | chr21 | antisense                        |                                                   |  |  |  |  |  |
| ENSG00000183888.4  | 5.557968412  | -2.907744202 | 0.001143578 | 0.010265309 | 0    | 0    | 0.02 | 0.08 |  | C1orf64       | chr1  | protein_coding                   | chromosome 1 open reading frame 64                |  |  |  |  |  |
| ENSG00000261101.2  | 4.340045504  | -0.476277295 | 1.07E-19    | 3.00E-17    | 0.08 | 0.12 | 1.87 | 1.87 |  | RP4-545K15.5  | chrX  | sense_overlapping                |                                                   |  |  |  |  |  |
| ENSG00000272661.1  | 2.386922047  | -2.218028104 | 0.001202791 | 0.010680343 | 0.19 | 0    | 0.4  | 0.49 |  | RP4-548D19.3  | chr7  | antisense                        |                                                   |  |  |  |  |  |
| ENSG00000244480.1  | 2.163446398  | -2.122516342 | 0.002171422 | 0.016979913 | 0.1  | 0    | 0.22 | 0.16 |  | AC005154.7    | chr7  | transcribed_processed_pseudogene |                                                   |  |  |  |  |  |
| ENSG00000186765.11 | -1.28312507  | 0.958620547  | 5.24E-07    | 1.97E-05    | 1.57 | 1.44 | 0.69 | 0.38 |  | FSCN2         | chr17 | protein_coding                   | fascin actin-bundling protein 2, retinal          |  |  |  |  |  |
| ENSG00000152926.14 | 1.45026925   | 1.973835234  | 3.99E-12    | 4.67E-10    | 0.22 | 0.25 | 0.64 | 0.48 |  | ZNF117        | chr7  | protein_coding                   | zinc finger protein 117                           |  |  |  |  |  |
| ENSG00000268225.1  | 1.789395645  | -1.260854245 | 0.000245935 | 0.003151917 | 0.28 | 0.05 | 0.32 | 0.68 |  | CTD-2331H12.5 | chr19 | processed_pseudogene             |                                                   |  |  |  |  |  |
| ENSG00000182607.44 | 1.1500744    | -0.880947    | 0.004350    | 0.028379    | 0.32 | 0.51 | 0.49 | 1.17 |  | C2orf82       | chr2  | protein_coding                   | chromosome 2 open reading frame 82                |  |  |  |  |  |

|                    |              |              |             |             |      |      |      |      |               |       |                                    |                                                                        |  |  |  |  |  |  |  |
|--------------------|--------------|--------------|-------------|-------------|------|------|------|------|---------------|-------|------------------------------------|------------------------------------------------------------------------|--|--|--|--|--|--|--|
| 00.9               | 57           | 564          | 088         | 553         |      |      |      |      |               |       |                                    |                                                                        |  |  |  |  |  |  |  |
| ENSG00000278829.1  | -1.60200634  | -1.365335668 | 0.002368083 | 0.017891052 | 0.95 | 0.22 | 0.21 | 0.12 | RP11-358B23.7 | chr17 | sense_intronic                     |                                                                        |  |  |  |  |  |  |  |
| ENSG00000244623.1  | 2.488391467  | -2.43624661  | 0.002941218 | 0.021287883 | 0.08 | 0    | 0.37 | 0    | OR2AE1        | chr7  | protein_coding                     | olfactory receptor, family 2, subfamily AE, member 1                   |  |  |  |  |  |  |  |
| ENSG00000169282.17 | 5.24452133   | -3.078482142 | 0.004334073 | 0.028324191 | 0    | 0    | 0    | 0.05 | KCNAB1        | chr3  | protein_coding                     | potassium channel, voltage gated subfamily A regulatory beta subunit 1 |  |  |  |  |  |  |  |
| ENSG00000171345.13 | 2.263587234  | -0.128089759 | 6.02E-11    | 5.70E-09    | 0.31 | 0.15 | 0.68 | 1.27 | KRT19         | chr17 | protein_coding                     | keratin 19, type I                                                     |  |  |  |  |  |  |  |
| ENSG00000263941.2  | 4.128051107  | -2.374307385 | 6.16E-05    | 0.001036856 | 0    | 0.09 | 0.71 | 1.12 | RN7SL32P      | chr2  | misc_RNA                           | RNA, 7SL, cytoplasmic 32, pseudogene                                   |  |  |  |  |  |  |  |
| ENSG00000256518.2  | 6.036260299  | -2.615165403 | 4.29E-05    | 0.000773691 | 0    | 0    | 0.08 | 0.51 | RP11-807H22.5 | chr11 | transcribed_unprocessed_pseudogene |                                                                        |  |  |  |  |  |  |  |
| ENSG00000121743.3  | -1.637462706 | -0.991404843 | 0.000312504 | 0.003749619 | 0.13 | 0.2  | 0.07 | 0    | GJA3          | chr13 | protein_coding                     | gap junction protein, alpha 3, 46kDa                                   |  |  |  |  |  |  |  |
| ENSG00000204947.8  | 1.485858282  | 1.573352055  | 2.80E-11    | 2.87E-09    | 0.56 | 0.43 | 1.18 | 1.24 | ZNF425        | chr7  | protein_coding                     | zinc finger protein 425                                                |  |  |  |  |  |  |  |
| ENSG0000018869.16  | 1.822620628  | -1.34033238  | 0.000251562 | 0.003208238 | 0.05 | 0.05 | 0.06 | 0.27 | ZNF582        | chr19 | protein_coding                     | zinc finger protein 582                                                |  |  |  |  |  |  |  |
| ENSG00000135077.8  | 1.437243741  | -0.877642341 | 0.000640631 | 0.006637412 | 0.14 | 0.05 | 0.17 | 0.29 | HAVCR2        | chr5  | protein_coding                     | hepatitis A virus cellular receptor 2                                  |  |  |  |  |  |  |  |
| ENSG00000241933.1  | -6.361939752 | -2.141869736 | 1.71E-06    | 5.45E-05    | 0.06 | 0.15 | 0    | 0    | RP11-755B10.3 | chr3  | lincRNA                            |                                                                        |  |  |  |  |  |  |  |
| ENSG00000236514.1  | -2.497657168 | -2.390718535 | 0.005060939 | 0.032002387 | 0.26 | 0.25 | 0.07 | 0    | RP11-162G10.5 | chr10 | antisense                          |                                                                        |  |  |  |  |  |  |  |
| ENSG00000106328.9  | 3.990101602  | -1.393689999 | 2.93E-10    | 2.53E-08    | 0.02 | 0.01 | 0.34 | 0.18 | FSCN3         | chr7  | protein_coding                     | fascin actin-bundling protein 3, testicular                            |  |  |  |  |  |  |  |
| ENSG00000106328.9  | -2.09        | 0.363        | 3.36        | 3.40        | 0    | 0.5  | 0.16 | 0.1  | RP11-1        | chr11 | protein_coding                     |                                                                        |  |  |  |  |  |  |  |

|                            |                      |                      |                     |                     |          |          |      |      |                   |       |                          |                                                                        |
|----------------------------|----------------------|----------------------|---------------------|---------------------|----------|----------|------|------|-------------------|-------|--------------------------|------------------------------------------------------------------------|
| 0002585<br>29.5            | 4881<br>878          | 9844<br>77           | E-11                | E-09                | 72       | 7        |      |      | 08O10.<br>8       |       |                          |                                                                        |
| ENSG00<br>0002357<br>25.1  | 2.120<br>5483<br>06  | -0.77<br>3802<br>558 | 2.25<br>E-07        | 9.48<br>E-06        | 0.<br>2  | 0.0<br>6 | 0.31 | 0.68 | AC0073<br>89.3    | chr2  | lincRNA                  |                                                                        |
| ENSG00<br>0002607<br>35.1  | 1.327<br>7177<br>55  | -1.07<br>4432<br>104 | 0.00<br>2804<br>384 | 0.02<br>0522<br>104 | 0.<br>06 | 0.1<br>3 | 0.24 | 0.18 | RP11-7<br>218.1   | chr16 | antisense                |                                                                        |
| ENSG00<br>0002494<br>00.1  | 5.815<br>0679<br>71  | -2.75<br>4937<br>748 | 0.00<br>0305<br>021 | 0.00<br>3673<br>222 | 0        | 0        | 0.18 | 0.39 | HMGB3<br>P17      | chr5  | processed_pseudo<br>gene | high mobility group<br>box 3 pseudogene<br>17                          |
| ENSG00<br>0002415<br>47.1  | 1.442<br>3672<br>92  | 0.698<br>4114<br>92  | 4.09<br>E-08        | 2.14<br>E-06        | 1.<br>67 | 2.0<br>7 | 4.2  | 4.77 | ACTG1P<br>20      | chr1  | processed_pseudo<br>gene | actin gamma 1<br>pseudogene 20                                         |
| ENSG00<br>0002155<br>95.1  | 3.306<br>4880<br>14  | -1.33<br>7008<br>293 | 1.16<br>E-08        | 6.95<br>E-07        | 0.<br>08 | 0        | 0.39 | 0.35 | C20orf2<br>02     | chr20 | protein_coding           | chromosome 20<br>open reading frame<br>202                             |
| ENSG00<br>0001442<br>85.15 | 6.227<br>7577<br>31  | -2.48<br>7752<br>274 | 1.17<br>E-05        | 0.00<br>0263<br>728 | 0        | 0        | 0    | 0.06 | SCN1A             | chr2  | protein_coding           | sodium channel,<br>voltage gated, type I<br>alpha subunit              |
| ENSG00<br>0002726<br>78.1  | 2.278<br>1927<br>12  | -2.55<br>4250<br>344 | 0.00<br>8668<br>518 | 0.04<br>7101<br>87  | 0.<br>14 | 0.0<br>7 | 0.22 | 0.72 | RP11-7<br>97D24.4 | chr3  | antisense                |                                                                        |
| ENSG00<br>0001626<br>16.8  | 1.119<br>0354<br>02  | 4.847<br>9827<br>93  | 1.46<br>E-11        | 1.55<br>E-09        | 6.<br>61 | 5.6<br>4 | 12.7 | 10.6 | DNAJB4            | chr1  | protein_coding           | DnaJ (Hsp40)<br>homolog, subfamily<br>B, member 4                      |
| ENSG00<br>0001556<br>66.11 | -1.12<br>7594<br>859 | 1.991<br>5444<br>22  | 8.40<br>E-08        | 4.04<br>E-06        | 1.<br>97 | 2.0<br>1 | 0.73 | 0.87 | KDM8              | chr16 | protein_coding           | lysine (K)-specific<br>demethylase 8                                   |
| ENSG00<br>0001644<br>00.5  | 1.167<br>3323<br>03  | 0.821<br>2403<br>77  | 3.73<br>E-06        | 0.00<br>0101<br>862 | 1.<br>64 | 1.1<br>4 | 2.93 | 2.52 | CSF2              | chr5  | protein_coding           | colony stimulating<br>factor 2<br>(granulocyte-macrop<br>hage)         |
| ENSG00<br>0001715<br>09.15 | 1.241<br>3947<br>28  | 0.436<br>0126<br>4   | 7.70<br>E-06        | 0.00<br>0185<br>335 | 0.<br>21 | 0.1<br>5 | 0.34 | 0.42 | RXFP1             | chr4  | protein_coding           | relaxin/insulin-like<br>family peptide<br>receptor 1                   |
| ENSG00<br>0001574<br>04.15 | -5.55<br>2830<br>658 | -2.69<br>9141<br>7   | 0.00<br>0589<br>815 | 0.00<br>6205<br>402 | 0.<br>02 | 0.0<br>5 | 0    | 0    | KIT               | chr4  | protein_coding           | v-kit<br>Hardy-Zuckerman 4<br>feline sarcoma viral<br>oncogene homolog |
| ENSG00<br>0000905<br>12.11 | -5.84<br>6105<br>007 | -2.50<br>8093<br>704 | 0.00<br>0158<br>16  | 0.00<br>2180<br>283 | 0.<br>04 | 0.1<br>8 | 0    | 0    | FETUB             | chr3  | protein_coding           | fetuin B                                                               |

|                    |              |              |             |             |      |      |       |       |               |       |                                    |                                                          |
|--------------------|--------------|--------------|-------------|-------------|------|------|-------|-------|---------------|-------|------------------------------------|----------------------------------------------------------|
| ENSG00000182109.7  | 1.913774505  | 1.127913977  | 1.37E-14    | 2.12E-12    | 0.45 | 0.26 | 1.45  | 0.88  | RP11-69E11.4  | chr1  | antisense                          |                                                          |
| ENSG00000135407.10 | 2.415288159  | 1.520706968  | 4.85E-24    | 2.06E-21    | 0.27 | 0.37 | 1.56  | 1.46  | AVIL          | chr12 | protein_coding                     | advillin                                                 |
| ENSG00000255583.2  | 1.415365136  | -0.032415917 | 9.18E-06    | 0.0021575   | 0.2  | 0.16 | 0.6   | 0.24  | RP11-415I12.2 | chr12 | transcribed_unprocessed_pseudogene |                                                          |
| ENSG00000138315.12 | 5.28235845   | -0.764069471 | 1.46E-18    | 3.52E-16    | 0.02 | 0    | 0.4   | 0.47  | OIT3          | chr10 | protein_coding                     | oncprotein induced transcript 3                          |
| ENSG00000214796.8  | -2.453312741 | -0.893399207 | 5.08E-07    | 1.92E-05    | 0.38 | 0.16 | 0.08  | 0     | RP11-480I12.5 | chr1  | transcribed_unprocessed_pseudogene |                                                          |
| ENSG00000158517.13 | 3.626873554  | -1.677264177 | 7.38E-08    | 3.60E-06    | 0.04 | 0.02 | 0.39  | 0.27  | NCF1          | chr7  | protein_coding                     | neutrophil cytosolic factor 1                            |
| ENSG00000264575.1  | -1.716619576 | -0.564389036 | 1.61E-05    | 0.00345084  | 0.49 | 0.48 | 0.15  | 0.1   | LINC00526     | chr18 | lincRNA                            | long intergenic non-protein coding RNA 526               |
| ENSG00000140798.15 | 2.618300521  | -2.076041111 | 0.000252727 | 0.003208238 | 0    | 0.02 | 0.07  | 0.05  | ABCC12        | chr16 | protein_coding                     | ATP-binding cassette, sub-family C (CFTR/MRP), member 12 |
| ENSG00000235285.1  | -1.271237637 | -1.235655323 | 0.009308249 | 0.049605695 | 1.35 | 0.75 | 0.48  | 0.26  | SMIM2-IT1     | chr13 | sense_intronic                     | SMIM2 intronic transcript 1                              |
| ENSG00000281468.1  | -5.75741765  | -2.567502897 | 0.00015816  | 0.002180283 | 0.42 | 0.2  | 0     | 0     | CTC-459F4.9   | chr19 | sense_intronic                     |                                                          |
| ENSG00000207205.1  | 6.77218279   | 1.170026474  | 5.31E-60    | 1.55E-56    | 0.49 | 0    | 20.36 | 29.71 | RNVU1-15      | chr1  | snRNA                              | RNA, variant U1 small nuclear 15                         |
| ENSG00000262903.1  | 1.143970192  | 0.400442579  | 5.77E-05    | 0.000996436 | 1.42 | 0.47 | 1.89  | 1.73  | RP11-235E17.6 | chr17 | antisense                          |                                                          |
| ENSG00000166819.11 | 1.977270008  | -0.652256812 | 6.34E-07    | 2.34E-05    | 0.07 | 0.09 | 0.25  | 0.34  | PLIN1         | chr15 | protein_coding                     | perilipin 1                                              |
| ENSG00000268894.6  | -5.657376663 | -2.632563046 | 0.000305021 | 0.003673222 | 0.05 | 0.17 | 0     | 0     | PLCE1-AS1     | chr10 | antisense                          | PLCE1 antisense RNA 1                                    |

|                    |                       |                      |              |              |      |      |      |      |                   |       |                      |                                              |
|--------------------|-----------------------|----------------------|--------------|--------------|------|------|------|------|-------------------|-------|----------------------|----------------------------------------------|
| ENSG00000129682.13 | -6.29<br>9479<br>8258 | -2.18<br>79<br>06    | 3.25<br>E-06 | 9.05<br>E-05 | 0.01 | 0.02 | 0    | 0    | FGF13             | chrX  | protein_coding       | fibroblast growth factor 13                  |
| ENSG00000167941.2  | 5.688<br>9572<br>0820 | -2.83<br>446<br>815  | 0.00<br>0589 | 0.00<br>6205 | 0    | 0    | 0.09 | 0.05 | SOST              | chr17 | protein_coding       | sclerostin                                   |
| ENSG00000276980.1  | -3.33<br>8475<br>2815 | -1.37<br>308<br>337  | 2.51<br>E-07 | 1.04<br>E-05 | 0.46 | 0.36 | 0.06 | 0    | CTD-31<br>28G10.7 | chr19 | sense_intronic       |                                              |
| ENSG00000277610.1  | 3.846<br>5727<br>1936 | -1.94<br>996         | 2.92<br>E-07 | 1.18<br>E-05 | 0    | 0.31 | 2.08 | 2.49 | RNVU1<br>-4       | chr1  | snRNA                | RNA, variant U1 small nuclear 4              |
| ENSG00000173825.6  | 3.445<br>5122<br>5098 | 2.229<br>61<br>36    | 2.29<br>E-49 | 4.32<br>E-46 | 0.39 | 0.42 | 3.28 | 4.47 | TIGD3             | chr11 | protein_coding       | tigger transposable element derived 3        |
| ENSG00000277895.1  | -2.08<br>8128<br>3265 | -1.96<br>571<br>3508 | 0.00<br>E-49 | 0.02<br>4472 | 0.31 | 0.16 | 0.09 | 0    | RP11-1<br>14F3.4  | chr12 | antisense            |                                              |
| ENSG00000223547.9  | 2.303<br>3819<br>8727 | -2.26<br>675<br>241  | 0.00<br>E-49 | 0.01<br>6171 | 0.01 | 0.01 | 0.02 | 0.05 | ZNF844            | chr19 | protein_coding       | zinc finger protein 844                      |
| ENSG00000175267.14 | 3.508<br>6121<br>6446 | -2.75<br>839<br>4007 | 0.00<br>E-49 | 0.02<br>7138 | 0.01 | 0.01 | 0.03 | 0.04 | VWA3A             | chr16 | protein_coding       | von Willebrand factor A domain containing 3A |
| ENSG00000249492.1  | 2.797<br>5912<br>0222 | -2.62<br>725<br>2214 | 0.00<br>E-49 | 0.01<br>6979 | 0.06 | 0.05 | 0.53 | 0.2  | RP11-1<br>59F24.3 | chr5  | processed_transcript |                                              |
| ENSG00000276272.1  | 2.106<br>0950<br>3724 | -1.64<br>531<br>0147 | 0.00<br>E-49 | 0.00<br>2105 | 0    | 0.16 | 0.07 | 0.6  | RP11-1<br>21C6.5  | chr12 | lincRNA              |                                              |
| ENSG00000141052.17 | -1.56<br>2123<br>5339 | 1.709<br>5<br>4.06   | E-12         | 4.71<br>E-10 | 0.58 | 0.53 | 0.15 | 0.17 | MYOCD             | chr17 | protein_coding       | myocardin                                    |
| ENSG00000274276.4  | -5.18<br>5173<br>9269 | -2.91<br>738<br>4334 | 0.00<br>E-07 | 0.02<br>8324 | 0.06 | 0.04 | 0    | 0    | CBS               | chr21 | protein_coding       | cystathionine-beta-synthase                  |
| ENSG00000212123.3  | -1.00<br>1198<br>9345 | 3.162<br>981<br>39   | 4.11<br>E-08 | 2.15<br>E-06 | 9.05 | 7.94 | 3.33 | 4.11 | PRR22             | chr19 | protein_coding       | proline rich 22                              |
| ENSG00000259120.2  | -1.38<br>1499<br>6802 | 0.349<br>924<br>19   | 4.32<br>E-06 | 0.00<br>0114 | 1.31 | 1.81 | 0.31 | 0.75 | SMIM6             | chr17 | protein_coding       | small integral membrane protein 6            |
| ENSG0000010831.1   | 1.083<br>1499<br>6802 | 1.665<br>924<br>19   | 5.04<br>E-06 | 1.91<br>819  | 0    | 0.43 | 1.07 | 0.78 | CDRT1             | chr17 | protein_coding       | CMT1A duplicated                             |



|                            |                      |                      |                     |                     |          |           |      |      |                   |       |                          |                                                      |  |  |  |  |                     |
|----------------------------|----------------------|----------------------|---------------------|---------------------|----------|-----------|------|------|-------------------|-------|--------------------------|------------------------------------------------------|--|--|--|--|---------------------|
| 0002413<br>22.8            | 0017<br>72           | 3310<br>3            | E-07                | E-05                | 6        |           |      |      |                   |       |                          |                                                      |  |  |  |  | region transcript 1 |
| ENSG00<br>0002139<br>43.3  | 7.249<br>7992<br>58  | -1.71<br>1776<br>555 | 2.88<br>E-10        | 2.50<br>E-08        | 0        | 0         | 0.58 | 0.17 | KRT18P<br>17      | chr3  | processed_pseudo<br>gene | keratin 18<br>pseudogene 17                          |  |  |  |  |                     |
| ENSG00<br>0002283<br>35.1  | 3.004<br>8792<br>92  | 0.418<br>5922<br>24  | 4.46<br>E-21        | 1.49<br>E-18        | 0.<br>84 | 0.1<br>7  | 3.85 | 3.21 | AC0730<br>63.10   | chr7  | processed_pseudo<br>gene |                                                      |  |  |  |  |                     |
| ENSG00<br>0002142<br>79.12 | 6.035<br>4436<br>69  | -2.61<br>5534<br>254 | 4.29<br>E-05        | 0.00<br>0773<br>691 | 0        | 0         | 0.12 | 0.49 | SCART1            | chr10 | unitary_pseudogen<br>e   |                                                      |  |  |  |  |                     |
| ENSG00<br>0002255<br>18.2  | -4.73<br>8544<br>775 | -1.42<br>9907<br>073 | 7.99<br>E-09        | 5.07<br>E-07        | 0.<br>62 | 0.7<br>2  | 0.03 | 0    | RP11-3<br>96C23.2 | chr1  | lincRNA                  |                                                      |  |  |  |  |                     |
| ENSG00<br>0002790<br>07.1  | 1.568<br>5332<br>26  | 0.826<br>6700<br>7   | 1.18<br>E-09        | 9.05<br>E-08        | 2.<br>37 | 2.4<br>5  | 3.64 | 9.05 | FKSG56            | chr9  | protein_coding           |                                                      |  |  |  |  |                     |
| ENSG00<br>0001343<br>39.8  | 2.141<br>0804<br>72  | -1.23<br>6630<br>967 | 1.35<br>E-05        | 0.00<br>0297<br>891 | 0.       | 0.1<br>02 | 0.26 | 0.25 | SAA2              | chr11 | protein_coding           | serum amyloid A2                                     |  |  |  |  |                     |
| ENSG00<br>0001769<br>27.14 | 4.428<br>6966<br>6   | -2.16<br>5964<br>142 | 4.81<br>E-07        | 1.83<br>E-05        | 0        | 0         | 0.05 | 0.06 | EFCAB5            | chr17 | protein_coding           | EF-hand calcium<br>binding domain 5                  |  |  |  |  |                     |
| ENSG00<br>0001537<br>07.15 | -1.63<br>3539<br>4   | -0.88<br>8655<br>283 | 0.00<br>0388<br>768 | 0.00<br>4463<br>38  | 0.       | 0.0<br>08 | 0.02 | 0.02 | PTPRD             | chr9  | protein_coding           | protein tyrosine<br>phosphatase,<br>receptor type, D |  |  |  |  |                     |
| ENSG00<br>0001282<br>42.12 | 1.027<br>6226<br>41  | 2.061<br>2669<br>28  | 4.10<br>E-07        | 1.61<br>E-05        | 1.<br>32 | 1.0<br>1  | 2.01 | 2.15 | GAL3ST<br>1       | chr22 | protein_coding           | galactose-3-O-sulfot<br>ransferase 1                 |  |  |  |  |                     |
| ENSG00<br>0002381<br>32.2  | 5.691<br>4423<br>94  | -2.82<br>9709<br>359 | 0.00<br>0589<br>815 | 0.00<br>6205<br>402 | 0        | 0         | 0.09 | 0.17 | CASC4P<br>1       | chr13 | processed_pseudo<br>gene | cancer susceptibility<br>candidate 4<br>pseudogene 1 |  |  |  |  |                     |
| ENSG00<br>0002725<br>55.1  | 2.999<br>4322<br>82  | -1.57<br>2895<br>528 | 6.99<br>E-07        | 2.55<br>E-05        | 0        | 0.2<br>8  | 0.19 | 2    | RP11-4<br>59I19.1 | chr2  | lincRNA                  |                                                      |  |  |  |  |                     |
| ENSG00<br>0001121<br>16.9  | 2.596<br>1935<br>94  | -2.37<br>5874<br>802 | 0.00<br>0982<br>727 | 0.00<br>9290<br>055 | 0        | 0         | 0.13 | 0.41 | IL17F             | chr6  | protein_coding           | interleukin 17F                                      |  |  |  |  |                     |
| ENSG00<br>0002262<br>66.6  | -1.95<br>1902<br>362 | -1.80<br>7995<br>122 | 0.00<br>3401<br>932 | 0.02<br>3956<br>332 | 0.       | 0.1<br>12 | 0.02 | 0.04 | AC0099<br>61.3    | chr2  | lincRNA                  |                                                      |  |  |  |  |                     |
| ENSG00<br>0002320          | 1.365<br>0508        | 1.591<br>2060        | 6.54<br>E-10        | 5.22<br>E-08        | 0.<br>39 | 0.3<br>1  | 0.79 | 0.79 | ZBED9             | chr6  | protein_coding           | zinc finger, BED-type<br>containing 9                |  |  |  |  |                     |



|                    |       |       |      |      |      |      |       |       |   |  |  |  |  |               |       |                        |  |  |  |  |                                                                                                   |
|--------------------|-------|-------|------|------|------|------|-------|-------|---|--|--|--|--|---------------|-------|------------------------|--|--|--|--|---------------------------------------------------------------------------------------------------|
| 25.12              | 401   | 346   |      | 691  |      |      |       |       |   |  |  |  |  |               |       |                        |  |  |  |  | erase 6                                                                                           |
| ENSG00000143195.12 | 3.506 | -2.75 | 0.00 | 0.02 |      |      |       |       |   |  |  |  |  | ILDR2         | chr1  | protein_coding         |  |  |  |  | immunoglobulin-like domain containing receptor 2                                                  |
| ENSG00000266925.1  | 5.410 | -2.99 | 0.00 | 0.01 |      |      |       |       |   |  |  |  |  | RP11-434D2.7  | chr17 | lincRNA                |  |  |  |  |                                                                                                   |
| ENSG00000279583.1  | 1.365 | -0.64 | 0.00 | 0.00 | 0.53 | 0.15 | 0.88  | 0.65  |   |  |  |  |  | RP11-368N21.5 | chr16 | TEC                    |  |  |  |  |                                                                                                   |
| ENSG00000236824.1  | 1.098 | 7.271 | 6.89 | 7.75 | 6.53 | 8.17 | 11.71 | 15.87 |   |  |  |  |  | BCYRN1        | chr2  | lincRNA                |  |  |  |  | brain cytoplasmic RNA 1                                                                           |
| ENSG00000234773.6  | 3.526 | -2.16 | 1.03 | 0.00 | 0.02 | 0.02 | 0.22  | 0.25  |   |  |  |  |  | CTD-2666L21.1 | chr19 | lincRNA                |  |  |  |  |                                                                                                   |
| ENSG00000234199.2  | 6.087 | -0.80 | 1.32 | 3.59 | 0.00 | 0.03 | 1.42  | 0.93  |   |  |  |  |  | LINC01191     | chr2  | lincRNA                |  |  |  |  | long intergenic non-protein coding RNA 1191                                                       |
| ENSG00000163806.15 | 1.737 | -0.34 | 1.12 | 3.81 | 0.23 | 0.15 | 0.7   | 0.43  |   |  |  |  |  | SPDYA         | chr2  | protein_coding         |  |  |  |  | speedy/RINGO cell cycle regulator family member A                                                 |
| ENSG00000101049.14 | 1.181 | -1.03 | 0.00 | 0.04 | 0.01 | 0.09 | 0.24  | 0.13  |   |  |  |  |  | SGK2          | chr20 | protein_coding         |  |  |  |  | serum/glucocorticoid regulated kinase 2                                                           |
| ENSG00000159871.14 | -1.60 | 1.494 | 1.14 | 1.23 | 1.17 | 1.73 | 0.42  | 0.42  |   |  |  |  |  | LYPD5         | chr19 | protein_coding         |  |  |  |  | LY6/PLAUR domain containing 5                                                                     |
| ENSG00000223403.3  | -2.10 | -1.70 | 0.00 | 0.00 | 0.08 | 0.08 | 0.2   | 0.05  | 0 |  |  |  |  | MEG9          | chr14 | lincRNA                |  |  |  |  | maternally expressed 9 (non-protein coding)                                                       |
| ENSG00000171195.10 | 3.955 | -1.86 | 9.00 | 4.29 | 0.00 | 0.02 | 0.14  | 0.15  |   |  |  |  |  | MUC7          | chr4  | protein_coding         |  |  |  |  | mucin 7, secreted                                                                                 |
| ENSG00000263232.2  | 5.237 | -3.08 | 0.00 | 0.04 | 0.00 | 0.00 | 0.15  | 0     |   |  |  |  |  | ATP5A1P3      | chr16 | processed_pseudogene   |  |  |  |  | ATP synthase, H <sup>+</sup> transporting, mitochondrial F1 complex, alpha subunit 1 pseudogene 3 |
| ENSG00000262081.2  | 5.056 | -3.17 | 0.00 | 0.04 | 0.00 | 0.00 | 0     | 0.18  |   |  |  |  |  | IL9RP4        | chr18 | unprocessed_pseudogene |  |  |  |  | interleukin 9 receptor pseudogene 4                                                               |

|                    |              |              |             |             |       |       |       |       |               |       |                                    |                                              |
|--------------------|--------------|--------------|-------------|-------------|-------|-------|-------|-------|---------------|-------|------------------------------------|----------------------------------------------|
| ENSG00000143552.9  | 5.708773153  | 0.510064482  | 7.09E-41    | 8.89E-38    | 0     | 0.02  | 0.55  | 0.32  | NUP210L       | chr1  | protein_coding                     | nucleoporin 210kDa-like                      |
| ENSG00000267552.6  | 1.431765785  | 1.372765744  | 5.44E-10    | 4.42E-08    | 2.41  | 1.63  | 4.29  | 5.27  | CTD-2528L19.4 | chr19 | protein_coding                     |                                              |
| ENSG00000202538.1  | -6.095352697 | -2.33644235  | 1.17E-05    | 0.00263728  | 3.63  | 0     | 0     | 0     | RNU4-2        | chr12 | snRNA                              | RNA, U4 small nuclear 2                      |
| ENSG00000185467.7  | 1.219882742  | 0.417508371  | 1.19E-05    | 0.00267334  | 0.33  | 0.59  | 0.83  | 1.07  | KPNA7         | chr7  | protein_coding                     | karyopherin alpha 7 (importin alpha 8)       |
| ENSG00000273306.1  | 1.129891542  | -0.944414176 | 0.007667826 | 0.044277031 | 0.6   | 0.37  | 1     | 0.85  | RP11-527J8.1  | chr2  | antisense                          |                                              |
| ENSG00000164093.15 | 1.05863213   | -0.041723415 | 0.000656924 | 0.00677955  | 0.09  | 0.14  | 0.15  | 0.29  | PITX2         | chr4  | protein_coding                     | paired-like homeodomain 2                    |
| ENSG00000183674.11 | 3.377202195  | -1.862131014 | 1.21E-06    | 4.03E-05    | 0.02  | 0.04  | 0.3   | 0.28  | LINC00518     | chr6  | lincRNA                            | long intergenic non-protein coding RNA 518   |
| ENSG00000233327.10 | 1.735238292  | -1.866124135 | 0.007351292 | 0.042881724 | 0.05  | 0     | 0.07  | 0.07  | USP32P2       | chr17 | transcribed_unprocessed_pseudogene | ubiquitin specific peptidase 32 pseudogene 2 |
| ENSG00000265241.6  | -1.010565564 | 7.919528777  | 2.38E-10    | 2.10E-08    | 65.52 | 65.62 | 29.28 | 27.74 | RBM8A         | chr1  | protein_coding                     | RNA binding motif protein 8A                 |
| ENSG00000257511.1  | 1.555544352  | 0.284753155  | 1.48E-07    | 6.56E-06    | 0.8   | 0.43  | 1.76  | 1.41  | RP11-278C7.1  | chr12 | processed_pseudogene               |                                              |
| ENSG00000240137.5  | -2.411021092 | -2.047794514 | 0.002171422 | 0.016979913 | 0.48  | 0.45  | 0     | 0.15  | ERICH6-AS1    | chr3  | antisense                          | ERICH6 antisense RNA 1                       |
| ENSG00000273951.1  | -6.29947979  | -2.18825806  | 3.25E-06    | 9.05E-05    | 0.33  | 0.55  | 0     | 0     | RP4-620E11.8  | chr20 | sense_intronic                     |                                              |
| ENSG00000239636.1  | 1.763149318  | -1.187943976 | 0.000238131 | 0.003071333 | 0.16  | 0.27  | 0.6   | 0.7   | RP4-728D4.2   | chr1  | antisense                          |                                              |
| ENSG00000262772.1  | -2.233035058 | -0.912183076 | 3.04E-06    | 8.77E-05    | 0.48  | 0.34  | 0.1   | 0.05  | RP11-353N14.2 | chr17 | lincRNA                            |                                              |
| ENSG00000135888.1  | -5.66        | -2.63        | 0.00        | 0.00        | 0.0   | 0.0   | 0     | 0     | AL3588        | chr6  | protein_coding                     |                                              |

|         |       |       |      |         |    |     |      |      |              |       |                        |                                            |  |
|---------|-------|-------|------|---------|----|-----|------|------|--------------|-------|------------------------|--------------------------------------------|--|
| 0002788 | 0716  | 0675  | 0305 | 3673    | 25 | 4   |      |      | 52.1         |       |                        |                                            |  |
| 99.1    | 54    | 922   | 021  | 222     |    |     |      |      |              |       |                        |                                            |  |
| ENSG00  | -5.31 | -2.84 | 0.00 | 0.01    |    |     |      |      |              |       |                        |                                            |  |
| 0002551 | 6618  | 3086  | 2223 | 6979    | 0  | 0.5 | 0    | 0    | STX17-AS1    | chr9  | antisense              | STX17 antisense RNA 1                      |  |
| 45.2    | 396   | 468   | 255  | 913     |    | 1   |      |      |              |       |                        |                                            |  |
| ENSG00  | -1.13 | 1.002 |      | 0.00    |    |     |      |      |              |       |                        |                                            |  |
| 0002599 | 9658  | 4937  | 5.75 | 0.00    | 1. | 1.6 | 0.89 | 0.45 | RP1-39G22.7  | chr1  | antisense              |                                            |  |
| 43.1    | 404   | 56    | E-06 | 0145895 | 73 | 7   |      |      |              |       |                        |                                            |  |
| ENSG00  | 1.058 | 1.710 |      |         |    |     |      |      |              |       |                        |                                            |  |
| 0002344 | 1165  | 2087  | 7.04 | 2.56    | 1. | 1.1 | 2.06 | 3.01 | RP11-213G2.1 | chr9  | unprocessed_pseudogene |                                            |  |
| 24.2    | 82    | 25    | E-07 | E-05    | 6  | 7   |      |      |              |       |                        |                                            |  |
| ENSG00  | 1.236 | 1.657 |      |         |    |     |      |      |              |       |                        |                                            |  |
| 0002792 | 4288  | 9907  | 1.40 | 8.20    | 1. | 1.3 | 3.1  | 2.26 | RP4-614O4.13 | chr20 | TEC                    |                                            |  |
| 53.1    | 08    | 6     | E-08 | E-07    | 23 | 6   |      |      |              |       |                        |                                            |  |
| ENSG00  | 1.600 | 2.804 |      |         |    |     |      |      |              |       |                        |                                            |  |
| 0001893 | 7060  | 5068  | 4.64 | 9.92    | 2. | 2.6 | 8    | 6.62 | S100A14      | chr1  | protein_coding         | S100 calcium binding protein A14           |  |
| 34.8    | 93    | 21    | E-17 | E-15    | 91 |     |      |      |              |       |                        |                                            |  |
| ENSG00  | -1.32 | -0.68 | 0.00 | 0.00    |    |     |      |      |              |       |                        |                                            |  |
| 0002353 | 3568  | 7483  | 0.00 | 0.00    | 0. | 0.2 | 0.09 | 0.12 | LINC00957    | chr7  | lincRNA                | long intergenic non-protein coding RNA 957 |  |
| 14.1    | 14    | 96    | 0900 | 8725    | 37 | 3   |      |      |              |       |                        |                                            |  |
| ENSG00  | 1.677 | -1.43 | 0.00 | 0.01    |    |     |      |      |              |       |                        |                                            |  |
| 0002293 | 8604  | 0167  | 1206 | 0703    | 0. | 0.3 | 0.89 | 0.75 | HY1-AS1      | chr1  | antisense              | HY1 antisense RNA 1                        |  |
| 48.1    | 27    | 734   | 703  | 964     | 25 | 3   |      |      |              |       |                        |                                            |  |
| ENSG00  | 1.221 | -0.78 | 0.00 | 0.01    |    |     |      |      |              |       |                        |                                            |  |
| 0001883 | 7665  | 7451  | 2174 | 6979    | 0. | 0.1 | 0.22 | 0.23 | SLC38A3      | chr3  | protein_coding         | solute carrier family 38, member 3         |  |
| 38.14   | 09    | 21    | 796  | 913     | 04 | 8   |      |      |              |       |                        |                                            |  |
| ENSG00  | -5.44 | -2.76 | 0.00 | 0.01    |    |     |      |      |              |       |                        |                                            |  |
| 0001689 | 1961  | 7936  | 1143 | 0265    | 0. | 0.0 | 0    | 0    | ZNF608       | chr5  | protein_coding         | zinc finger protein 608                    |  |
| 16.15   | 724   | 284   | 578  | 309     | 04 | 2   |      |      |              |       |                        |                                            |  |
| ENSG00  | -6.59 | -1.96 |      |         |    |     |      |      |              |       |                        |                                            |  |
| 0002355 | 1760  | 7793  | 2.56 | 1.05    | 0. | 0.0 | 0    | 0    | NFAM1        | chr22 | protein_coding         | NFAT activating protein with ITAM motif 1  |  |
| 68.6    | 387   | 763   | E-07 | E-05    | 05 | 7   |      |      |              |       |                        |                                            |  |
| ENSG00  | 5.559 | -2.90 | 0.00 | 0.01    |    |     |      |      |              |       |                        |                                            |  |
| 0002590 | 6378  | 7001  | 1143 | 0265    | 0  | 0   | 0    | 0.89 | ENSAP2       | chr14 | processed_pseudogene   | endosulfine alpha pseudogene 2             |  |
| 32.2    | 07    | 505   | 578  | 309     |    |     |      |      |              |       |                        |                                            |  |
| ENSG00  | 5.410 | -2.99 | 0.00 | 0.01    |    |     |      |      |              |       |                        |                                            |  |
| 0002700 | 6228  | 0239  | 2223 | 6979    | 0  | 0   | 0    | 0.18 | AP000473.8   | chr21 | lincRNA                |                                            |  |
| 93.1    | 32    | 64    | 255  | 913     |    |     |      |      |              |       |                        |                                            |  |
| ENSG00  | 1.772 | 1.792 |      |         |    |     |      |      |              |       |                        |                                            |  |
| 0000155 | 1161  | 5358  | 4.69 | 9.36    | 0. | 0.3 | 0.85 | 0.98 | NPC1L1       | chr7  | protein_coding         | NPC1-like 1                                |  |
| 20.14   | 93    | 14    | E-16 | E-14    | 3  | 1   |      |      |              |       |                        |                                            |  |
| ENSG00  | -5.31 | -2.84 | 0.00 | 0.01    | 0. | 0.0 | 0    | 0    | DUOXA1       | chr15 | protein_coding         | dual oxidase maturation factor 1           |  |
| 0001402 | 9635  | 1390  | 2223 | 6979    | 07 | 2   |      |      |              |       |                        |                                            |  |









|                    |              |              |             |             |      |      |      |      |               |       |                                  |                                                         |
|--------------------|--------------|--------------|-------------|-------------|------|------|------|------|---------------|-------|----------------------------------|---------------------------------------------------------|
| ENSG00000172361.5  | 3.026548667  | 1.919886595  | 6.80E-38    | 6.89E-35    | 0.42 | 0.5  | 3.43 | 3.16 | CFAP53        | chr18 | protein_coding                   | cilia and flagella associated protein 53                |
| ENSG00000224259.5  | -1.241605715 | 0.934851003  | 1.56E-06    | 5.06E-05    | 2.42 | 2.16 | 0.87 | 0.82 | LINC01133     | chr1  | lincRNA                          | long intergenic non-protein coding RNA 1133             |
| ENSG00000250782.1  | 5.056889643  | -3.172374913 | 0.008472213 | 0.046592746 | 0    | 0    | 0    | 0.37 | RP11-432M8.1  | chr5  | processed_pseudogene             |                                                         |
| ENSG00000133321.10 | 1.583647242  | 0.972849613  | 1.93E-10    | 1.72E-08    | 0.61 | 0.94 | 1.52 | 2.62 | RARRES3       | chr11 | protein_coding                   | retinoic acid receptor responder (tazarotene induced) 3 |
| ENSG00000206567.9  | -5.035472108 | -3.002462011 | 0.008472213 | 0.046592746 | 0    | 0    | 0    | 0    | AC022007.5    | chr3  | lincRNA                          |                                                         |
| ENSG00000274269.1  | 5.239464552  | -3.080716256 | 0.004334073 | 0.028324191 | 0    | 0    | 0.3  | 0.11 | RP4-545L17.12 | chr20 | processed_transcript             |                                                         |
| ENSG00000182050.13 | 3.015566068  | -2.493891318 | 0.000672711 | 0.006880458 | 0    | 0    | 0.01 | 0    | MGAT4C        | chr12 | protein_coding                   | MGAT4 family, member C                                  |
| ENSG00000253190.3  | 5.24452133   | -3.078482142 | 0.004334073 | 0.028324191 | 0    | 0    | 0    | 0.26 | AC084082.3    | chr8  | lincRNA                          |                                                         |
| ENSG00000231407.5  | -5.440086194 | -2.768992263 | 0.001143578 | 0.010265309 | 0.03 | 0.08 | 0    | 0    | RP11-576I22.2 | chr1  | antisense                        |                                                         |
| ENSG00000151651.15 | 2.412652028  | 2.168921884  | 4.72E-29    | 2.96E-26    | 0.53 | 0.37 | 1.85 | 2.31 | ADAM8         | chr10 | protein_coding                   | ADAM metalloproteinase domain 8                         |
| ENSG00000276600.4  | -1.317144875 | 0.939344001  | 3.13E-07    | 1.26E-05    | 0.63 | 0.97 | 0.35 | 0.2  | RAB7B         | chr1  | protein_coding                   | RAB7B, member RAS oncogene family                       |
| ENSG00000255624.2  | 1.011199898  | 0.966303193  | 3.47E-05    | 0.000656012 | 0.77 | 1.17 | 2.04 | 1.4  | RP11-564D11.3 | chr10 | transcribed_processed_pseudogene |                                                         |
| ENSG00000168779.19 | 1.206369237  | -0.386093555 | 0.000717187 | 0.007250886 | 0.13 | 0.12 | 0.38 | 0.12 | SHOX2         | chr3  | protein_coding                   | short stature homeobox 2                                |
| ENSG00000181085.14 | -1.554343926 | -1.392507979 | 0.004882494 | 0.031147802 | 0.25 | 0.2  | 0.01 | 0.12 | MAPK15        | chr8  | protein_coding                   | mitogen-activated protein kinase 15                     |

|                    |                  |              |             |             |      |      |      |      |               |       |                                    |                                               |
|--------------------|------------------|--------------|-------------|-------------|------|------|------|------|---------------|-------|------------------------------------|-----------------------------------------------|
| ENSG00000108813.10 | -1.0542812356265 | 2.937235606  | 1.48E-08    | 8.58E-07    | 3.62 | 3.74 | 1.54 | 1.56 | DLX4          | chr17 | protein_coding                     | distal-less homeobox 4                        |
| ENSG00000140937.13 | -5.185173935     | -2.919269738 | 0.004334073 | 0.028324191 | 0.02 | 0.01 | 0    | 0    | CDH11         | chr16 | protein_coding                     | cadherin 11, type 2, OB-cadherin (osteoblast) |
| ENSG00000269058.5  | 2.752066485      | -1.746665238 | 1.49E-05    | 0.00323467  | 0.04 | 0.06 | 0.11 | 0.54 | CALR3         | chr19 | protein_coding                     | calreticulin 3                                |
| ENSG00000189212.12 | 5.243677416      | -3.078854719 | 0.004334073 | 0.028324191 | 0    | 0    | 0.01 | 0.05 | DPY19L2P1     | chr7  | transcribed_unprocessed_pseudogene | DPY19L2 pseudogene 1                          |
| ENSG00000272768.1  | -1.517722533     | -1.423928312 | 0.003758971 | 0.025841819 | 0.24 | 0.37 | 0.18 | 0    | RP4-673M15.1  | chr7  | antisense                          |                                               |
| ENSG00000249306.5  | 1.55153203       | 2.34208951   | 7.36E-15    | 1.19E-12    | 0.78 | 0.83 | 1.98 | 2.17 | LINC01411     | chr5  | lincRNA                            | long intergenic non-protein coding RNA 1411   |
| ENSG00000276814.1  | 1.619210089      | -1.369562904 | 0.001129089 | 0.010265309 | 0.19 | 0.16 | 0.2  | 0.77 | RP1-228P16.8  | chr12 | lincRNA                            |                                               |
| ENSG00000204397.7  | -5.036615664     | -3.001821553 | 0.008472213 | 0.046592746 | 0.1  | 0.18 | 0    | 0    | CARD16        | chr11 | protein_coding                     | caspase recruitment domain family, member 16  |
| ENSG00000268785.1  | 3.209144229      | -2.376005112 | 0.000112018 | 0.001665518 | 0    | 0.07 | 0.31 | 0.35 | RPL7P50       | chr19 | processed_pseudogene               | ribosomal protein L7 pseudogene 50            |
| ENSG00000204086.4  | -5.036234388     | -3.002035067 | 0.008472213 | 0.046592746 | 0.03 | 0.1  | 0    | 0    | RPA4          | chrX  | protein_coding                     | replication protein A4, 30kDa                 |
| ENSG00000224956.5  | -1.367341422     | 1.11626654   | 2.79E-08    | 1.51E-06    | 2.96 | 1.86 | 1.29 | 0.31 | RP11-206L10.1 | chr1  | unprocessed_pseudogene             |                                               |
| ENSG00000227963.1  | -1.885967795     | -0.613020492 | 5.79E-06    | 0.00146515  | 0.33 | 0.35 | 0.11 | 0.05 | RP5-1074L1.1  | chr1  | antisense                          |                                               |
| ENSG00000112041.12 | 4.1312634        | -2.372843477 | 6.16E-05    | 0.001036856 | 0    | 0.01 | 0.04 | 0.2  | TULP1         | chr6  | protein_coding                     | tubby like protein 1                          |
| ENSG00000167608.11 | 1.191243831      | -0.967242056 | 0.006568648 | 0.039380488 | 0.1  | 0.13 | 0.31 | 0.15 | TMC4          | chr19 | protein_coding                     | transmembrane channel-like 4                  |
| ENSG000001624      | 1.624            | -1.68        | 0.00        | 0.02        | 0    | 0.0  | 0.03 | 0.22 | CTD-21        | chr19 | protein_coding                     |                                               |

|         |       |       |      |      |    |     |      |      |         |       |                    |                       |                     |
|---------|-------|-------|------|------|----|-----|------|------|---------|-------|--------------------|-----------------------|---------------------|
| 0002677 | 8258  | 0946  | 3027 | 1782 |    | 8   |      |      | 05E13.6 |       |                    |                       |                     |
| 06.3    | 46    | 327   | 211  | 035  |    |     |      |      |         |       |                    |                       |                     |
| ENSG00  | 5.552 | -2.90 | 0.00 | 0.01 |    |     |      |      |         |       |                    |                       |                     |
| 0001117 | 9704  | 9970  | 1143 | 0265 | 0  | 0   | 0.08 | 0.02 | AICDA   | chr12 | protein_coding     | activation-induced    | cytidine deaminase  |
| 32.10   | 73    | 174   | 578  | 309  |    |     |      |      |         |       |                    |                       |                     |
| ENSG00  | -2.73 | -2.23 | 0.00 | 0.02 |    |     |      |      |         |       |                    |                       |                     |
| 0002608 | 9861  | 4601  | 3346 | 3625 | 0. | 0.5 | 0.05 | 0.06 | CTD-20  | chr15 | antisense          |                       |                     |
| 92.1    | 541   | 966   | 059  | 851  | 33 | 4   |      |      | 26K11.1 |       |                    |                       |                     |
| ENSG00  | -1.45 | -1.21 | 0.00 | 0.02 |    |     |      |      |         |       |                    |                       |                     |
| 0002065 | 8999  | 3780  | 3915 | 6702 | 0. | 0.5 | 0.06 | 0.18 | RP11-5  | chr3  | lincRNA            |                       |                     |
| 32.2    | 461   | 201   | 634  | 756  | 18 | 8   |      |      | 53A10.1 |       |                    |                       |                     |
| ENSG00  | 5.334 | -0.71 |      |      |    |     |      |      |         |       |                    |                       |                     |
| 0001176 | 8464  | 3446  | 3.11 | 8.03 | 0. | 0   | 0.89 | 0.41 | SERPIN  | chr1  | protein_coding     | serpin peptidase      | inhibitor, clade C  |
| 01.13   | 35    | 632   | E-19 | E-17 | 03 |     |      |      | C1      |       |                    | (antithrombin),       | member 1            |
| ENSG00  | -2.20 | -1.88 | 0.00 | 0.01 |    |     |      |      |         |       |                    |                       |                     |
| 0001446 | 5264  | 4915  | 2223 | 6979 | 0. | 0.1 | 0.05 | 0    | SLC22A  | chr3  | protein_coding     | solute carrier family | 22, member 14       |
| 71.10   | 242   | 824   | 629  | 913  | 13 | 6   |      |      | 14      |       |                    |                       |                     |
| ENSG00  | 5.408 | -2.99 | 0.00 | 0.01 |    |     |      |      |         |       |                    |                       |                     |
| 0002739 | 9444  | 0983  | 2223 | 6979 | 0  | 0   | 0.22 | 0.85 | Metazo  | chr2  | misc_RNA           |                       |                     |
| 50.1    | 88    | 521   | 255  | 913  |    |     |      |      | a_SRP   |       |                    |                       |                     |
| ENSG00  | -5.55 | -2.69 | 0.00 | 0.00 |    |     |      |      |         |       |                    |                       |                     |
| 0001384 | 4695  | 8089  | 0589 | 6205 | 0. | 0.0 | 0    | 0    | MDH1B   | chr2  | protein_coding     | malate                | dehydrogenase 1B,   |
| 00.12   | 703   | 655   | 815  | 402  | 08 | 5   |      |      |         |       |                    | NAD (soluble)         |                     |
| ENSG00  | 1.905 | -2.27 | 0.00 | 0.04 |    |     |      |      |         |       |                    |                       |                     |
| 0002615 | 7327  | 1712  | 9023 | 8439 | 0. | 0.1 | 0.38 | 0.28 | RP11-2  | chr17 | transcribed_unproc | essed_pseudogene      |                     |
| 75.2    | 39    | 984   | 285  | 923  | 04 | 5   |      |      | 59G18.1 |       |                    |                       |                     |
| ENSG00  | -5.03 | -3.00 | 0.00 | 0.04 |    |     |      |      |         |       |                    |                       |                     |
| 0001843 | 8141  | 0967  | 8472 | 6592 | 0. | 0.0 | 0    | 0    | COLEC1  | chr8  | protein_coding     | collectin sub-family  | member 10 (C-type   |
| 74.2    | 67    | 22    | 213  | 746  | 15 | 4   |      |      | 0       |       |                    | lectin)               |                     |
| ENSG00  | 1.861 | -1.21 | 0.00 | 0.00 |    |     |      |      |         |       |                    |                       |                     |
| 0001114 | 1336  | 3714  | 0112 | 1671 | 0. | 0.0 | 0.29 | 0.15 | ENDOU   | chr12 | protein_coding     | endonuclease,         | polyU-specific      |
| 05.8    | 36    | 411   | 756  | 63   | 1  | 4   |      |      |         |       |                    |                       |                     |
| ENSG00  | 1.403 | -0.78 | 0.00 | 0.00 |    |     |      |      |         |       |                    |                       |                     |
| 0001431 | 1376  | 4244  | 0311 | 3742 | 0. | 0.0 | 0.12 | 0.15 | ITGA10  | chr1  | protein_coding     | integrin, alpha 10    |                     |
| 27.12   | 78    | 773   | 611  | 314  | 04 | 8   |      |      |         |       |                    |                       |                     |
| ENSG00  | 2.956 | -1.03 |      |      |    |     |      |      |         |       |                    |                       |                     |
| 0002332 | 5076  | 5302  | 1.05 | 8.12 | 0. | 0   | 0.29 | 0.73 | AC0060  | chr7  | processed_pseudo   | gene                  |                     |
| 64.2    | 66    | 504   | E-09 | E-08 | 15 |     |      |      | 42.8    |       |                    |                       |                     |
| ENSG00  | -1.60 | 0.312 |      |      |    |     |      |      |         |       |                    |                       |                     |
| 0001836 | 9400  | 9688  | 1.49 | 6.57 | 0. | 0.4 | 0.19 | 0.09 | PSG9    | chr19 | protein_coding     | pregnancy specific    | beta-1-glycoprotein |
| 68.17   | 449   | 93    | E-07 | E-06 | 58 | 2   |      |      |         |       |                    | 9                     |                     |
| ENSG00  | 1.833 | -2.12 | 0.00 | 0.04 |    |     |      |      |         |       |                    |                       |                     |
|         |       |       |      |      | 0. | 0.0 | 0.21 | 0.16 | DPPA2   | chr3  | protein_coding     | developmental         |                     |





|                    |               |              |             |             |      |      |      |      |               |       |                       |                                                                         |
|--------------------|---------------|--------------|-------------|-------------|------|------|------|------|---------------|-------|-----------------------|-------------------------------------------------------------------------|
| ENSG00000237588.2  | 5.237782528   | -3.081460244 | 0.008472213 | 0.046592746 | 0    | 0    | 0.06 | 0    | RP11-66D17.3  | chr1  | lincRNA               |                                                                         |
| ENSG00000204978.2  | 6.036260278.2 | -2.615165403 | 4.29E-05    | 0.000773691 | 0    | 0    | 0.06 | 0.4  | ERICH4        | chr19 | protein_coding        | glutamate-rich 4                                                        |
| ENSG00000118620.12 | 1.246673162   | 3.09402099   | 9.04E-12    | 9.99E-10    | 0.83 | 0.71 | 1.79 | 1.41 | ZNF430        | chr19 | protein_coding        | zinc finger protein 430                                                 |
| ENSG00000204671.1  | 4.12364456    | -2.375926765 | 6.16E-05    | 0.001036856 | 0.03 | 0    | 0.38 | 0.17 | IL31          | chr12 | protein_coding        | interleukin 31                                                          |
| ENSG00000259449.1  | 4.366144173   | -2.211766449 | 1.03E-05    | 0.000236764 | 0.03 | 0    | 0    | 0.72 | NIFKP8        | chr15 | processed_pseudo gene | nucleolar protein interacting with the FHA domain of MKI67 pseudogene 8 |
| ENSG00000130300.8  | 2.480023659   | -0.996722984 | 7.45E-08    | 3.63E-06    | 0.02 | 0.1  | 0.25 | 0.38 | PLVAP         | chr19 | protein_coding        | plasmalemma vesicle associated protein                                  |
| ENSG00000163792.6  | 5.055193141   | -3.173121159 | 0.008472213 | 0.046592746 | 0    | 0    | 0.01 | 0.03 | TCF23         | chr2  | protein_coding        | transcription factor 23                                                 |
| ENSG00000279406.1  | 2.114160907   | 0.964159658  | 2.79E-16    | 5.65E-14    | 0.29 | 0.41 | 1.54 | 1.12 | RP11-327E2.5  | chr10 | TEC                   |                                                                         |
| ENSG00000256092.2  | -2.687466178  | -1.542969256 | 3.12E-05    | 0.000600067 | 0.24 | 0.17 | 0.05 | 0    | RP13-942N8.1  | chr12 | lincRNA               |                                                                         |
| ENSG00000153684.14 | -5.552085217  | -2.699562334 | 0.000589815 | 0.006205402 | 0.01 | 0.06 | 0    | 0    | GOLGA8F       | chr15 | protein_coding        | golgin A8 family, member F                                              |
| ENSG00000163462.17 | -4.144936461  | -0.352855917 | 3.26E-16    | 6.55E-14    | 0.2  | 0.38 | 0.02 | 0.01 | TRIM46        | chr1  | protein_coding        | tripartite motif containing 46                                          |
| ENSG00000272871.1  | 3.206478575   | -1.983222792 | 6.49E-06    | 0.000160025 | 0.04 | 0.02 | 0.13 | 0.42 | RP11-408A13.4 | chr9  | lincRNA               |                                                                         |
| ENSG00000196263.7  | 3.633465875   | -2.685130261 | 0.00221421  | 0.016979913 | 0    | 0    | 0.02 | 0.04 | ZNF471        | chr19 | protein_coding        | zinc finger protein 471                                                 |
| ENSG00000156194.17 | 5.055193141   | -3.173121159 | 0.008472213 | 0.046592746 | 0    | 0    | 0.02 | 0.05 | PPEF2         | chr4  | protein_coding        | protein phosphatase, EF-hand calcium binding domain 2                   |

|                    |              |              |                 |             |      |      |      |      |                  |       |                                    |                                                          |
|--------------------|--------------|--------------|-----------------|-------------|------|------|------|------|------------------|-------|------------------------------------|----------------------------------------------------------|
| ENSG00000164845.16 | -1.151479558 | 1.020724851  | 4.620121E-06502 | 0.00        | 2.68 | 2.67 | 0.95 | 1.17 | FAM86FP          | chr12 | transcribed_unprocessed_pseudogene | family with sequence similarity 86, member F, pseudogene |
| ENSG00000188672.16 | -2.411489088 | -2.050075895 | 0.002171422     | 0.016979913 | 0.06 | 0.21 | 0.04 | 0    | RHCE             | chr1  | protein_coding                     | Rh blood group, CcEe antigens                            |
| ENSG00000267104.2  | -1.839768251 | -1.88363498  | 0.008005966     | 0.045688649 | 0.16 | 0.18 | 0.06 | 0.02 | TBC1D3P1-DHX40P1 | chr17 | lincRNA                            | TBC1D3P1-DHX40P1 readthrough transcribed pseudogene      |
| ENSG00000269524.1  | 2.795522204  | -2.621536487 | 0.00221421      | 0.016979913 | 0    | 0.14 | 0.95 | 0    | CTB-83J4.1       | chr19 | lincRNA                            |                                                          |
| ENSG00000250132.6  | -1.343788857 | -0.247257952 | 0.000109001     | 0.001636939 | 0.23 | 0.35 | 0.12 | 0.08 | RP11-359B12.2    | chr12 | antisense                          |                                                          |
| ENSG00000138336.8  | 2.054542894  | -1.825716017 | 0.000907628     | 0.008751665 | 0.01 | 0.01 | 0.03 | 0.05 | TET1             | chr10 | protein_coding                     | tet methylcytosine dioxygenase 1                         |
| ENSG00000162998.4  | 5.692271614  | -2.829338822 | 0.000589815     | 0.006205402 | 0    | 0    | 0.03 | 0.08 | FRZB             | chr2  | protein_coding                     | frizzled-related protein                                 |
| ENSG00000232995.7  | -1.34052891  | -0.82724306  | 0.001488139     | 0.012663363 | 0.35 | 0.08 | 0.06 | 0.09 | RGS5             | chr1  | antisense                          | regulator of G-protein signaling 5                       |
| ENSG00000239732.3  | 2.489575659  | -2.436873209 | 0.002941218     | 0.021287883 | 0    | 0.2  | 0.1  | 0    | TLR9             | chr3  | protein_coding                     | toll-like receptor 9                                     |
| ENSG00000175564.12 | 2.605416104  | 1.508851499  | 9.54E-27        | 5.24E-24    | 0.23 | 0.31 | 1.7  | 1.24 | UCP3             | chr11 | protein_coding                     | uncoupling protein 3 (mitochondrial, proton carrier)     |
| ENSG00000258940.2  | -2.310062972 | -2.504501642 | 0.008668518     | 0.04710187  | 0.22 | 0.06 | 0.04 | 0    | RP11-407N17.5    | chr14 | antisense                          |                                                          |
| ENSG00000235706.7  | -1.253592722 | -0.671802675 | 0.001461703     | 0.0124666   | 0.29 | 0.3  | 0.12 | 0.03 | DICER1-AS1       | chr14 | antisense                          | DICER1 antisense RNA 1                                   |
| ENSG00000187595.14 | -3.813745916 | -2.139757896 | 0.000186294     | 0.002504551 | 0.1  | 0.2  | 0    | 0.01 | ZNF385C          | chr17 | protein_coding                     | zinc finger protein 385C                                 |
| ENSG00000276384.1  | 5.558802896  | -2.907372898 | 0.001143578     | 0.010265309 | 0    | 0    | 0.07 | 0.66 | RP11-186B7.7     | chr17 | antisense                          |                                                          |

|                    |              |              |             |             |      |      |      |      |               |       |                                    |                                                                       |
|--------------------|--------------|--------------|-------------|-------------|------|------|------|------|---------------|-------|------------------------------------|-----------------------------------------------------------------------|
| ENSG00000205794.4  | 3.139447595  | -2.028466927 | 1.99E-05    | 0.000412624 | 0.03 | 0.02 | 0.18 | 0.23 | RP11-333E13.4 | chr4  | transcribed_processed_pseudogene   |                                                                       |
| ENSG00000196132.11 | 3.110441847  | -2.435488666 | 0.001702815 | 0.014165206 | 0.01 | 0    | 0.07 | 0    | MYT1          | chr20 | protein_coding                     | myelin transcription factor 1                                         |
| ENSG00000261239.6  | 5.237782528  | -3.081460244 | 0.008472213 | 0.046592746 | 0    | 0    | 0.04 | 0    | ANKRD26P1     | chr16 | transcribed_unprocessed_pseudogene | ankyrin repeat domain 26 pseudogene 1                                 |
| ENSG00000260518.1  | -3.528278426 | -2.337393579 | 0.001702815 | 0.014165206 | 0.14 | 0.06 | 0    | 0.02 | BMS1P8        | chr16 | transcribed_unprocessed_pseudogene | BMS1 ribosome biogenesis factor pseudogene 8                          |
| ENSG00000279019.1  | 1.364105819  | -0.921721055 | 0.001207889 | 0.010703964 | 0.11 | 0.04 | 0.19 | 0.14 | RP11-407G23.2 | chr16 | TEC                                |                                                                       |
| ENSG00000171747.8  | 2.610111211  | -0.32459885  | 6.31E-12    | 7.16E-10    | 0.18 | 0.12 | 0.83 | 0.74 | LGALS4        | chr19 | protein_coding                     | lectin, galactoside-binding, soluble, 4                               |
| ENSG00000109819.8  | 1.050650648  | 1.626552814  | 1.16E-06    | 3.92E-05    | 0.16 | 0.28 | 0.4  | 0.42 | PPARGC1A      | chr4  | protein_coding                     | peroxisome proliferator-activated receptor gamma, coactivator 1 alpha |
| ENSG00000119715.14 | 2.229510279  | -1.288505563 | 7.87E-06    | 0.00189184  | 0.09 | 0    | 0.24 | 0.13 | ESRRB         | chr14 | protein_coding                     | estrogen-related receptor beta                                        |
| ENSG00000115488.3  | 2.916029358  | -2.553697789 | 0.001221239 | 0.010739157 | 0    | 0.04 | 0.1  | 0.25 | NEU2          | chr2  | protein_coding                     | sialidase 2 (cytosolic sialidase)                                     |
| ENSG00000229618.1  | 4.211110638  | -2.318169827 | 3.39E-05    | 0.0006418   | 0.03 | 0    | 0.14 | 0.41 | AC011288.2    | chr7  | lincRNA                            |                                                                       |
| ENSG00000214756.7  | -1.032872185 | 0.296456267  | 0.00046163  | 0.005156046 | 0.86 | 0.65 | 0.39 | 0.25 | METTL12       | chr11 | protein_coding                     | methyltransferase like 12                                             |
| ENSG00000205670.10 | -5.184794561 | -2.919482528 | 0.004334073 | 0.028324191 | 0.07 | 0.06 | 0    | 0    | SMIM11        | chr21 | protein_coding                     | small integral membrane protein 11                                    |
| ENSG00000274933.4  | -1.952035776 | -1.810436938 | 0.003401932 | 0.023956332 | 0.03 | 0.16 | 0.04 | 0    | TBC1D31       | chr17 | protein_coding                     | TBC1 domain family, member 31                                         |
| ENSG00000102524.11 | 2.692497666  | -1.396416347 | 3.79E-07    | 1.50E-05    | 0.03 | 0.04 | 0.22 | 0.18 | TNFSF13B      | chr13 | protein_coding                     | tumor necrosis factor (ligand) superfamily, member 13b                |



|                    |              |              |             |             |      |      |      |      |                |       |                                    |                                                                  |
|--------------------|--------------|--------------|-------------|-------------|------|------|------|------|----------------|-------|------------------------------------|------------------------------------------------------------------|
| ENSG00000251079.6  | -1.234327808 | 0.273656582  | 5.25E-05    | 0.000920551 | 0.53 | 0.93 | 0.29 | 0.25 | BMS1P2         | chr10 | transcribed_unprocessed_pseudogene | BMS1 ribosome biogenesis factor pseudogene 2                     |
| ENSG00000274104.1  | -1.212878609 | 0.322093827  | 3.92E-05    | 0.000724891 | 1.94 | 4.02 | 1.53 | 0.7  | CTD-2553L13.10 | chr19 | lincRNA                            |                                                                  |
| ENSG00000248150.1  | 3.510669518  | -2.75592039  | 0.004007345 | 0.027138454 | 0    | 0    | 0.04 | 0.12 | RP1-167G20.1   | chr5  | lincRNA                            |                                                                  |
| ENSG00000146192.14 | -5.035472108 | -3.002462011 | 0.008472213 | 0.046592746 | 0    | 0    | 0    | 0    | FGD2           | chr6  | protein_coding                     | FYVE, RhoGEF and PH domain containing 2                          |
| ENSG00000110245.11 | 5.692271614  | -2.829338822 | 0.000589815 | 0.006205402 | 0    | 0    | 0.14 | 0.4  | APOC3          | chr11 | protein_coding                     | apolipoprotein C-III                                             |
| ENSG00000232442.1  | -1.013271625 | 1.796280457  | 1.80E-06    | 5.65E-05    | 6.05 | 5.23 | 3.23 | 1.61 | CTD-3184A7.4   | chr20 | antisense                          |                                                                  |
| ENSG00000279108.1  | 1.77387228   | -1.586530257 | 0.001344132 | 0.011610493 | 0.09 | 0.05 | 0.41 | 0    | CTC-490E21.11  | chr19 | TEC                                |                                                                  |
| ENSG00000012223.12 | -1.413706081 | -0.778135669 | 0.000802929 | 0.007988949 | 0.17 | 0.29 | 0.08 | 0.07 | LTF            | chr3  | protein_coding                     | lactotransferrin                                                 |
| ENSG00000207631.1  | 5.056041163  | -3.172748081 | 0.008472213 | 0.046592746 | 0    | 0    | 0.29 | 1.9  | MIR641         | chr19 | miRNA                              | microRNA 641                                                     |
| ENSG00000267199.1  | 2.052597143  | -1.826987874 | 0.000907628 | 0.008751665 | 0.01 | 0.02 | 0.06 | 0.06 | RP11-861E21.2  | chr18 | antisense                          |                                                                  |
| ENSG00000224903.1  | 2.816807228  | -1.944091255 | 5.20E-05    | 0.000913547 | 0.15 | 0    | 0.5  | 0.42 | AC005534.8     | chr7  | antisense                          |                                                                  |
| ENSG00000223502.1  | 5.056889643  | -3.172374913 | 0.008472213 | 0.046592746 | 0    | 0    | 0    | 0.52 | RP11-96B5.3    | chr10 | antisense                          |                                                                  |
| ENSG00000147437.9  | 1.172649901  | -1.099543705 | 0.008515959 | 0.046784485 | 0.11 | 0.19 | 0.39 | 0.2  | GNRH1          | chr8  | protein_coding                     | gonadotropin-releasing hormone 1 (luteinizing-releasing hormone) |
| ENSG00000105696.8  | 1.002562711  | -0.325495638 | 0.002684443 | 0.019798423 | 0.31 | 0.28 | 0.35 | 0.71 | TMEM59L        | chr19 | protein_coding                     | transmembrane protein 59-like                                    |

|                    |                |              |             |             |      |       |      |      |               |       |                      |                                             |
|--------------------|----------------|--------------|-------------|-------------|------|-------|------|------|---------------|-------|----------------------|---------------------------------------------|
| ENSG00000279133.1  | 1.130266933.1  | 0.220657111  | 0.000118867 | 0.0017509   | 0.18 | 0.19  | 0.41 | 0.31 | RP11-342K2.1  | chr17 | TEC                  |                                             |
| ENSG00000099617.3  | 1.563622417.3  | -1.4028384   | 0.002368083 | 0.017891052 | 0.14 | 0.22  | 0.57 | 0.36 | EFNA2         | chr19 | protein_coding       | ephrin-A2                                   |
| ENSG00000162897.14 | -2.02497497.14 | -2.004569441 | 0.005507409 | 0.034137494 | 0.15 | 0.06  | 0.04 | 0    | FCAMR         | chr1  | protein_coding       | Fc receptor, IgA, IgM, high affinity        |
| ENSG00000272323.1  | -3.74891023.1  | -2.186701773 | 6.16E-05    | 0.001036856 | 0.19 | 0.16  | 0.02 | 0    | CTD-2517O10.6 | chr5  | antisense            |                                             |
| ENSG00000204941.13 | -1.08035541.13 | 1.804012053  | 6.51E-07    | 2.39E-05    | 1    | 1.55  | 0.46 | 0.6  | PSG5          | chr19 | protein_coding       | pregnancy specific beta-1-glycoprotein 5    |
| ENSG00000251576.1  | 2.431990876.1  | -1.42215828  | 3.52E-06    | 9.77E-05    | 0.07 | 0.02  | 0.11 | 0.34 | LINC01267     | chr3  | lincRNA              | long intergenic non-protein coding RNA 1267 |
| ENSG00000174912.7  | 1.272240412.7  | -1.320759281 | 0.00548848  | 0.034092002 | 0.15 | 0.24  | 0.44 | 0.42 | METTL15P1     | chr3  | processed_pseudogene | methyltransferase like 15 pseudogene 1      |
| ENSG00000228661.1  | 5.694761761.1  | -2.828226684 | 0.000589815 | 0.006205402 | 0    | 0     | 0    | 0.7  | AC090587.5    | chr11 | antisense            |                                             |
| ENSG00000101342.9  | -2.20445142.9  | -2.185421976 | 0.009023285 | 0.048439923 | 0.08 | 0.11  | 0.03 | 0    | TLDC2         | chr20 | protein_coding       | TBC/LysM-associated domain containing 2     |
| ENSG00000277728.1  | 3.750673328.1  | -2.615774902 | 0.001221239 | 0.010739157 | 0    | 0.06  | 0    | 0.88 | RP11-143K11.7 | chr17 | antisense            |                                             |
| ENSG00000147174.11 | 1.801918274.11 | 1.436955009  | 5.01E-15    | 8.35E-13    | 0    | 0.43  | 0.98 | 1.28 | ACRC          | chrX  | protein_coding       | acidic repeat containing                    |
| ENSG00000182040.8  | 2.254212840.8  | -1.544575761 | 2.31E-05    | 0.000465098 | 0.03 | 0.03  | 0.05 | 0.21 | USH1G         | chr17 | protein_coding       | Usher syndrome 1G (autosomal recessive)     |
| ENSG00000270069.1  | 1.807389969.1  | 2.546076898  | 6.02E-20    | 1.74E-17    | 0    | 1.176 | 3.24 | 2.57 | MIR222HG      | chrX  | lincRNA              | MIR222 host gene                            |
| ENSG00000271150.1  | 5.407267850.1  | -2.991727045 | 0.002223255 | 0.016979913 | 0    | 0     | 0.42 | 0.58 | CTD-2571L23.9 | chr19 | processed_pseudogene |                                             |
| ENSG00000000000    | -2.74-2.23     | 0.000.00     | 0.000.00    | 0.000.00    | 0.4  | 0.13  | 0    | 0    | AP0007        | chr21 | lincRNA              |                                             |

|                            |                      |                      |                     |                     |          |          |      |      |                       |       |                            |                                                                                              |
|----------------------------|----------------------|----------------------|---------------------|---------------------|----------|----------|------|------|-----------------------|-------|----------------------------|----------------------------------------------------------------------------------------------|
| 0002247<br>90.1            | 2177<br>706          | 4143<br>04           | 0982<br>727         | 9290<br>055         | 68       | 7        |      |      | 04.5                  |       |                            |                                                                                              |
| ENSG00<br>0002564<br>27.1  | -5.32<br>0767<br>9   | -2.84<br>0754<br>582 | 0.00<br>2223<br>255 | 0.01<br>6979<br>913 | 1.<br>32 | 0        | 0    | 0    | RP11-1<br>18B22.4     | chr12 | lincRNA                    |                                                                                              |
| ENSG00<br>0002784<br>67.1  | -5.03<br>6234<br>388 | -3.00<br>2035<br>067 | 0.00<br>8472<br>213 | 0.04<br>6592<br>746 | 0.<br>09 | 0.3<br>1 | 0    | 0    | RP11-5<br>04P24.9     | chr1  | lincRNA                    |                                                                                              |
| ENSG00<br>0002795<br>20.1  | 1.620<br>8937<br>39  | 0.644<br>6285<br>45  | 1.86<br>E-09        | 1.35<br>E-07        | 0.<br>52 | 0.6<br>3 | 1.63 | 1.48 | RP11-2<br>0I23.2      | chr16 | TEC                        |                                                                                              |
| ENSG00<br>0002402<br>88.7  | 2.847<br>3064<br>07  | -1.28<br>3692<br>589 | 5.25<br>E-08        | 2.66<br>E-06        | 0.<br>05 | 0.0<br>6 | 0.3  | 0.4  | GHRLO<br>S            | chr3  | antisense                  | ghrelin opposite<br>strand/antisense<br>RNA                                                  |
| ENSG00<br>0001641<br>75.14 | 6.222<br>1058<br>23  | -2.49<br>0324<br>756 | 1.17<br>E-05        | 0.00<br>0263<br>728 | 0        | 0        | 0.07 | 0.08 | SLC45A<br>2           | chr5  | protein_coding             | solute carrier family<br>45, member 2                                                        |
| ENSG00<br>0002339<br>29.1  | 5.243<br>6774<br>16  | -3.07<br>8854<br>719 | 0.00<br>4334<br>073 | 0.02<br>8324<br>191 | 0        | 0        | 0.15 | 1.18 | MT1XP1                | chr1  | processed_pseudo<br>gene   | metallothionein 1X<br>pseudogene 1                                                           |
| ENSG00<br>0002728<br>00.1  | 1.519<br>9591<br>52  | -1.42<br>7470<br>608 | 0.00<br>2368<br>083 | 0.01<br>7891<br>052 | 0.<br>27 | 0.0<br>5 | 0.24 | 0.58 | RP11-4<br>38L19.1     | chr2  | lincRNA                    |                                                                                              |
| ENSG00<br>0002778<br>46.1  | -3.44<br>8181<br>455 | -2.39<br>1675<br>867 | 0.00<br>0672<br>711 | 0.00<br>6880<br>458 | 3.<br>08 | 3.2<br>8 | 0.41 | 0    | SNORD<br>30           | chr11 | snoRNA                     | small nucleolar RNA,<br>C/D box 30                                                           |
| ENSG00<br>0002234<br>59.5  | -1.78<br>8504<br>59  | -0.99<br>2613<br>919 | 0.00<br>0109<br>104 | 0.00<br>1636<br>939 | 0.<br>28 | 0.3<br>1 | 0.14 | 0    | TCAF1P<br>1           | chr7  | unprocessed_pseu<br>dogene | TRPM8<br>channel-associated<br>factor 1 pseudogene<br>1                                      |
| ENSG00<br>0001711<br>24.12 | 2.541<br>4660<br>55  | 0.029<br>0399<br>92  | 3.86<br>E-14        | 5.74<br>E-12        | 0.<br>06 | 0.1<br>7 | 0.65 | 0.55 | FUT3                  | chr19 | protein_coding             | fucosyltransferase 3<br>(galactoside<br>3(4)-L-fucosyltransfe<br>rase, Lewis blood<br>group) |
| ENSG00<br>0002578<br>30.1  | -6.01<br>3997<br>147 | -2.39<br>3045<br>874 | 4.29<br>E-05        | 0.00<br>0773<br>691 | 0.<br>25 | 0.4<br>7 | 0    | 0    | RP11-8<br>45M18.<br>7 | chr12 | antisense                  |                                                                                              |
| ENSG00<br>0002133<br>99.3  | 5.407<br>2678<br>92  | -2.99<br>1727<br>045 | 0.00<br>2223<br>255 | 0.01<br>6979<br>913 | 0        | 0        | 0.14 | 0.2  | AC0222<br>10.2        | chr2  | processed_pseudo<br>gene   |                                                                                              |
| ENSG00<br>0000997          | 2.578<br>2323        | -1.31<br>7326        | 8.48<br>E-07        | 3.01<br>E-05        | 0.<br>01 | 0.0<br>8 | 0.39 | 0.08 | IGFALS                | chr16 | protein_coding             | insulin-like growth<br>factor binding                                                        |

|                    |              |              |             |             |      |       |      |      |               |       |                        |  |  |  |  |                                                                     |
|--------------------|--------------|--------------|-------------|-------------|------|-------|------|------|---------------|-------|------------------------|--|--|--|--|---------------------------------------------------------------------|
| 69.5               | 23           | 585          |             |             |      |       |      |      |               |       |                        |  |  |  |  | protein, acid labile subunit                                        |
| ENSG00000120669.15 | 3.371829985  | -1.863876758 | 2.11E-06    | 6.44E-05    | 0.02 | 0     | 0.17 | 0.06 | SOHLH2        | chr13 | protein_coding         |  |  |  |  | spermatogenesis and oogenesis specific basic helix-loop-helix 2     |
| ENSG00000164061.4  | -1.264292541 | 1.460737816  | 4.40E-08    | 2.29E-06    | 0.22 | 0.25  | 0.09 | 0.08 | BSN           | chr3  | protein_coding         |  |  |  |  | bassoon presynaptic cytomatrix protein                              |
| ENSG00000171385.9  | -2.938569113 | 0.894491553  | 5.03E-22    | 1.77E-19    | 0.27 | 0.5   | 0.05 | 0.04 | KCND3         | chr1  | protein_coding         |  |  |  |  | potassium channel, voltage gated Shal related subfamily D, member 3 |
| ENSG00000165178.9  | 2.799663828  | -2.618907887 | 0.008668518 | 0.04710187  | 0.04 | 0     | 0.12 | 0.13 | NCF1C         | chr7  | unprocessed_pseudogene |  |  |  |  | neutrophil cytosolic factor 1C pseudogene                           |
| ENSG00000242861.1  | -1.231488649 | -0.267862567 | 0.000591338 | 0.006212229 | 2.86 | 3.16  | 0.82 | 1.44 | RP11-285F7.2  | chr1  | antisense              |  |  |  |  |                                                                     |
| ENSG00000259384.6  | -7.288735248 | 3.313267378  | 1.25E-11    | 1.65E-11    | 22.3 | 24.33 | 0.1  | 0.15 | GH1           | chr17 | protein_coding         |  |  |  |  | growth hormone 1                                                    |
| ENSG00000137707.13 | -5.036615664 | -3.001821553 | 0.008472213 | 0.046592746 | 0.05 | 0.09  | 0    | 0    | BTG4          | chr11 | protein_coding         |  |  |  |  | B-cell translocation gene 4                                         |
| ENSG00000259617.1  | 5.689785203  | -2.830450171 | 0.000589815 | 0.006205402 | 0    | 0     | 0.34 | 0.31 | RP11-540O11.6 | chr15 | antisense              |  |  |  |  |                                                                     |
| ENSG00000262652.1  | 1.79776169   | -1.831529644 | 0.004887632 | 0.031147802 | 0.05 | 0.3   | 0.96 | 0.11 | RP13-638C3.2  | chr17 | sense_intronic         |  |  |  |  |                                                                     |
| ENSG00000124171.8  | 1.234156488  | 2.999261054  | 1.91E-11    | 2.01E-09    | 0.85 | 1.18  | 2.28 | 1.92 | PARD6B        | chr20 | protein_coding         |  |  |  |  | par-6 family cell polarity regulator beta                           |
| ENSG00000273008.1  | -1.593174835 | -1.366273344 | 0.003408101 | 0.02398695  | 0.27 | 0.35  | 0.02 | 0.17 | RP11-351D16.3 | chr10 | lincRNA                |  |  |  |  |                                                                     |
| ENSG00000196569.11 | -1.572672688 | -1.1441103   | 0.000728339 | 0.007346714 | 0.06 | 0.06  | 0.03 | 0    | LAMA2         | chr6  | protein_coding         |  |  |  |  | laminin, alpha 2                                                    |
| ENSG00000180316.11 | 1.274489809  | -1.319722168 | 0.00548848  | 0.034092002 | 0.07 | 0.11  | 0.16 | 0.23 | PNPLA1        | chr6  | protein_coding         |  |  |  |  | patatin-like phospholipase domain containing 1                      |

|                    |              |              |             |             |      |      |      |      |               |       |                       |                                                                                   |
|--------------------|--------------|--------------|-------------|-------------|------|------|------|------|---------------|-------|-----------------------|-----------------------------------------------------------------------------------|
| ENSG00000226629.1  | 6.033811577  | -2.616271697 | 8.22E-05    | 0.001293661 | 0    | 0    | 0.07 | 0.13 | LINC00974     | chr17 | lincRNA               | long intergenic non-protein coding RNA 974                                        |
| ENSG00000279145.1  | 2.575820513  | -1.48195646  | 1.66E-06    | 5.35E-05    | 0.01 | 0.02 | 0.04 | 0.13 | RP11-547D13.1 | chr15 | TEC                   |                                                                                   |
| ENSG00000130032.15 | 1.046024268  | 0.795974034  | 4.52E-05    | 0.000811463 | 0.25 | 0.12 | 0.32 | 0.34 | PRRG3         | chrX  | protein_coding        | proline rich Gla (G-carboxyglutamic acid) 3 (transmembrane)                       |
| ENSG00000251639.2  | -1.951636906 | -1.605052912 | 0.000908163 | 0.008751665 | 0.2  | 0.47 | 0.14 | 0    | RP11-20I20.1  | chr4  | processed_pseudo gene |                                                                                   |
| ENSG00000267284.1  | 1.373405257  | -0.691808381 | 0.000363451 | 0.004250856 | 0.31 | 0.23 | 0.46 | 0.77 | RP11-397A16.1 | chr18 | lincRNA               |                                                                                   |
| ENSG00000232486.1  | 4.687182567  | -1.97884479  | 2.10E-08    | 1.18E-06    | 0    | 0.1  | 0    | 0.32 | RP11-18B3.2   | chr9  | processed_pseudo gene |                                                                                   |
| ENSG00000196503.2  | 2.682025119  | -1.583653962 | 1.18E-05    | 0.000264841 | 0.04 | 0.08 | 0.7  | 0    | ARL9          | chr4  | protein_coding        | ADP-ribosylation factor-like 9                                                    |
| ENSG00000240476.1  | -2.412026162 | -1.738006136 | 0.000343998 | 0.004075515 | 0.22 | 0.56 | 0    | 0.13 | LINC00973     | chr3  | lincRNA               | long intergenic non-protein coding RNA 973                                        |
| ENSG00000230337.1  | -2.874831531 | -0.916929973 | 1.06E-08    | 6.45E-07    | 1.38 | 1.78 | 0.35 | 0    | RP4-635E18.6  | chr1  | antisense             |                                                                                   |
| ENSG00000116819.6  | 2.394014833  | 0.330429256  | 1.36E-14    | 2.11E-12    | 0.34 | 0.03 | 0.7  | 1.03 | TFAP2E        | chr1  | protein_coding        | transcription factor AP-2 epsilon (activating enhancer binding protein 2 epsilon) |
| ENSG00000243135.5  | -5.036615664 | -3.001821553 | 0.008472213 | 0.046592746 | 0.02 | 0.03 | 0    | 0    | UGT1A3        | chr2  | protein_coding        | UDP glucuronosyltransferase 1 family, polypeptide A3                              |
| ENSG00000104129.9  | -1.16936222  | 2.909226163  | 4.31E-10    | 3.59E-08    | 2.64 | 2.84 | 1.28 | 0.84 | DNAJC17       | chr15 | protein_coding        | DnaJ (Hsp40) homolog, subfamily C, member 17                                      |
| ENSG00000141255.12 | 2.00967335   | -1.0219058   | 1.08E-05    | 0.000247064 | 0.11 | 0.04 | 0.26 | 0.28 | SPATA22       | chr17 | protein_coding        | spermatogenesis associated 22                                                     |

|                    |              |              |             |             |      |      |      |      |               |       |                        |                                                                       |
|--------------------|--------------|--------------|-------------|-------------|------|------|------|------|---------------|-------|------------------------|-----------------------------------------------------------------------|
| ENSG00000253258.1  | 2.871914791  | -1.907110943 | 3.06E-05    | 0.000590967 | 0    | 0.13 | 0.84 | 0.04 | RP11-539E17.5 | chr8  | antisense              |                                                                       |
| ENSG00000225762.1  | -5.037378486 | -3.001394442 | 0.008472213 | 0.046592746 | 0.28 | 0.21 | 0    | 0    | LINC01389     | chr1  | antisense              | long intergenic non-protein coding RNA 1389                           |
| ENSG00000280639.1  | -3.075331952 | -2.006439838 | 0.000252727 | 0.003208238 | 0.13 | 0.07 | 0.02 | 0    | RP11-96C21.2  | chr15 | lincRNA                |                                                                       |
| ENSG00000281433.1  | 2.769152856  | -2.269015817 | 0.000324907 | 0.003880758 | 0.3  | 0    | 1.06 | 0.82 | Metazoa_SRP   | chr3  | misc_RNA               |                                                                       |
| ENSG00000259900.5  | 2.505562375  | -1.368923149 | 1.36E-06    | 4.49E-05    | 0.19 | 0.11 | 0.87 | 0.61 | RP11-343C2.7  | chr16 | protein_coding         |                                                                       |
| ENSG00000169181.12 | 3.639926582  | 0.547341139  | 1.62E-28    | 9.46E-26    | 0.02 | 0.07 | 0.47 | 0.51 | GSG1L         | chr16 | protein_coding         | GSG1-like                                                             |
| ENSG00000168619.15 | 5.24452133   | -3.078482142 | 0.004334073 | 0.028324191 | 0    | 0    | 0    | 0.08 | ADAM18        | chr8  | protein_coding         | ADAM metalloproteinase domain 18                                      |
| ENSG00000272892.1  | -5.320012668 | -2.841178805 | 0.002223255 | 0.016979913 | 0.2  | 0.04 | 0    | 0    | RP11-57G10.8  | chr10 | lincRNA                |                                                                       |
| ENSG00000075340.22 | -1.953803534 | -1.423463129 | 0.000385931 | 0.004436607 | 0.06 | 0.03 | 0.02 | 0    | ADD2          | chr2  | protein_coding         | adducin 2 (beta)                                                      |
| ENSG00000259624.1  | 5.056889643  | -3.172374913 | 0.008472213 | 0.046592746 | 0    | 0    | 0    | 0.5  | RP11-138H8.3  | chr15 | antisense              |                                                                       |
| ENSG00000152611.11 | 1.82447122   | -1.68005173  | 0.002021669 | 0.016213368 | 0.17 | 0.04 | 0.2  | 0.47 | CAPSL         | chr5  | protein_coding         | calcyphosine-like                                                     |
| ENSG00000171617.13 | 2.297908583  | 1.817657229  | 1.45E-24    | 6.70E-22    | 0.25 | 0.19 | 0.95 | 0.91 | ENC1          | chr5  | protein_coding         | ectodermal-neural cortex 1 (with BTB domain)                          |
| ENSG00000248319.1  | 5.053498468  | -3.173867043 | 0.008472213 | 0.046592746 | 0    | 0    | 0.03 | 0.02 | RP11-205M3.3  | chr4  | lincRNA                |                                                                       |
| ENSG00000236123.1  | -5.038905215 | -3.000539885 | 0.008472213 | 0.046592746 | 0.42 | 0    | 0    | 0    | CEACAMP11     | chr19 | unprocessed_pseudogene | carcinoembryonic antigen-related cell adhesion molecule pseudogene 11 |

|                    |              |              |             |             |      |      |       |      |               |       |                      |                                                      |
|--------------------|--------------|--------------|-------------|-------------|------|------|-------|------|---------------|-------|----------------------|------------------------------------------------------|
| ENSG00000275173.1  | 5.559637807  | -2.907001505 | 0.001143578 | 0.010265309 | 0    | 0    | 0     | 0.66 | AC091199.1    | chr17 | lincRNA              |                                                      |
| ENSG00000120324.6  | -3.242517544 | -1.886171313 | 8.83E-05    | 0.001376364 | 0.11 | 0.1  | 0.02  | 0    | PCDHB10       | chr5  | protein_coding       | protocadherin beta 10                                |
| ENSG00000144445.15 | 1.468407231  | 0.649044702  | 3.30E-08    | 1.77E-06    | 0.1  | 0.23 | 0.39  | 0.43 | KANSL1L       | chr2  | protein_coding       | KAT8 regulatory NSL complex subunit 1-like           |
| ENSG00000266980.1  | 1.627247535  | 0.143628757  | 1.48E-07    | 6.56E-06    | 0.57 | 0.2  | 1.76  | 1.52 | RP11-552F3.4  | chr17 | antisense            |                                                      |
| ENSG00000236814.1  | 3.803908891  | -1.543244073 | 4.59E-09    | 3.08E-07    | 0    | 0.07 | 0.44  | 0.46 | RP11-446E9.1  | chr8  | processed_pseudogene |                                                      |
| ENSG00000234869.1  | 1.224042588  | -0.337137136 | 0.000386136 | 0.004437031 | 0.18 | 0.13 | 0.26  | 0.38 | RP3-439F8.1   | chr22 | antisense            |                                                      |
| ENSG00000276302.1  | 4.128051107  | -2.374307385 | 6.16E-05    | 0.001036856 | 0    | 0.05 | 0.36  | 0.56 | RP5-874C20.8  | chr6  | protein_coding       |                                                      |
| ENSG00000171234.13 | 5.410622832  | -2.99023964  | 0.002223255 | 0.016979913 | 0    | 0    | 0     | 0.15 | UGT2B7        | chr4  | protein_coding       | UDP glucuronosyltransferase 2 family, polypeptide B7 |
| ENSG00000183186.7  | -1.01108062  | -0.195174963 | 0.002158044 | 0.016979913 | 0.39 | 0.29 | 0.25  | 0.03 | C2CD4C        | chr19 | protein_coding       | C2 calcium-dependent domain containing 4C            |
| ENSG00000188959.9  | 4.838583571  | -1.152127301 | 6.10E-14    | 8.72E-12    | 0.01 | 0.01 | 0.28  | 0.27 | C9orf152      | chr9  | protein_coding       | chromosome 9 open reading frame 152                  |
| ENSG00000274735.1  | 7.450540164  | -1.544019755 | 1.44E-11    | 1.54E-09    | 0    | 0    | 15.76 | 3.93 | FP236383.3    | chr21 | miRNA                |                                                      |
| ENSG00000240211.1  | 3.551633295  | -0.727709471 | 3.74E-14    | 5.60E-12    | 0.27 | 0.34 | 1.88  | 4.67 | RP11-758P17.3 | chr7  | antisense            |                                                      |
| ENSG00000224020.1  | 1.975541779  | 1.661829185  | 1.32E-18    | 3.23E-16    | 1.87 | 2.08 | 7.01  | 6.65 | MIR181A2HG    | chr9  | antisense            | MIR181A2 host gene                                   |
| ENSG00000145700.1  | 1.9031018    | -1.394373    | 0.000168    | 0.002301    | 0.03 | 0.02 | 0.01  | 0.15 | IQGAP2        | chr5  | protein_coding       | IQ motif containing GTPase activating                |

|                    |           |           |          |          |       |       |       |       |               |       |                       |  |                                                        |
|--------------------|-----------|-----------|----------|----------|-------|-------|-------|-------|---------------|-------|-----------------------|--|--------------------------------------------------------|
| 03.15              | 44        | 77        | 358      | 014      |       |       |       |       |               |       |                       |  | protein 2                                              |
| ENSG00000265695.1  | 1.5651232 | -1.401409 | 0.002368 | 0.017891 | 2.81  | 2.29  | 6.8   | 6.57  | MIR3064       | chr17 | miRNA                 |  | microRNA 3064                                          |
| ENSG00000274751.1  | 2.3889424 | -1.986963 | 0.000501 | 0.005548 | 0     | 0.03  | 0.06  | 0.11  | LA16c-358B7.4 | chr16 | antisense             |  |                                                        |
| ENSG00000171931.12 | 1.9777261 | 2.4086908 | 1.69E-22 | 6.36E-20 | 0.73  | 0.52  | 1.92  | 2.39  | FBXW10        | chr17 | protein_coding        |  | F-box and WD repeat domain containing 10               |
| ENSG00000243910.7  | -5.185173 | -2.919269 | 0.004334 | 0.028324 | 0.12  | 0.07  | 0     | 0     | TUBA4B        | chr2  | protein_coding        |  | tubulin, alpha 4b                                      |
| ENSG00000272046.1  | 1.1710344 | -0.296969 | 0.000457 | 0.005114 | 0.12  | 0.15  | 0.19  | 0.35  | RP11-471M2.3  | chr13 | lincRNA               |  |                                                        |
| ENSG00000170579.14 | -2.955268 | -2.697749 | 0.007234 | 0.042343 | 0.02  | 0.02  | 0     | 0     | DLGAP1        | chr18 | protein_coding        |  | discs, large (Drosophila) homolog-associated protein 1 |
| ENSG00000085465.12 | 1.9093791 | 2.6020591 | 4.39E-22 | 1.56E-19 | 1.27  | 1.05  | 4.33  | 3.29  | OVGP1         | chr1  | protein_coding        |  | oviductal glycoprotein 1, 120kDa                       |
| ENSG00000277767.1  | -2.813863 | -2.186367 | 0.002010 | 0.016171 | 0.12  | 0.17  | 0.03  | 0     | RP11-365P13.5 | chr13 | lincRNA               |  |                                                        |
| ENSG00000267264.1  | -5.443463 | -2.767091 | 0.001143 | 0.010265 | 0.62  | 0     | 0     | 0     | CTC-459F4.6   | chr19 | processed_pseudo gene |  |                                                        |
| ENSG00000245317.2  | 1.3729303 | -0.323166 | 6.69E-05 | 0.001110 | 0.31  | 0.28  | 0.65  | 0.71  | CTC-241N9.1   | chr5  | lincRNA               |  |                                                        |
| ENSG00000162783.10 | 1.0412412 | 7.1454468 | 7.90E-11 | 7.41E-09 | 21.65 | 22.85 | 39.17 | 41.04 | IER5          | chr1  | protein_coding        |  | immediate early response 5                             |
| ENSG00000215769.8  | 1.1004559 | 2.1900999 | 4.17E-08 | 2.18E-06 | 0.96  | 1.19  | 2.04  | 1.99  | RP13-104F24.2 | chr17 | processed_transcript  |  |                                                        |
| ENSG00000204323.5  | 1.6100085 | -0.087588 | 4.57E-07 | 1.77E-05 | 0.11  | 0.07  | 0.14  | 0.35  | SMIM5         | chr17 | protein_coding        |  | small integral membrane protein 5                      |
| ENSG00000280700    | 5.6931012 | -2.828968 | 0.000589 | 0.006205 | 0     | 0     | 0.03  | 0.16  | JADRR         | chr4  | lincRNA               |  | JADE1 adjacent regulatory RNA                          |



|                    |              |              |             |             |      |      |      |      |                |       |                                    |                                                                          |  |  |  |  |  |  |  |  |  |  |
|--------------------|--------------|--------------|-------------|-------------|------|------|------|------|----------------|-------|------------------------------------|--------------------------------------------------------------------------|--|--|--|--|--|--|--|--|--|--|
| 11.1               | 52           | 197          | 815         | 402         |      |      |      |      |                |       |                                    |                                                                          |  |  |  |  |  |  |  |  |  |  |
| ENSG00000215039.6  | 2.413254972  | 0.593152794  | 6.00E-17    | 1.26E-14    | 0.37 | 0.19 | 1.42 | 1.16 | CD27-AS1       | chr12 | processed_transcript               | CD27 antisense RNA 1                                                     |  |  |  |  |  |  |  |  |  |  |
| ENSG00000205940.8  | 1.292249791  | -1.163578739 | 0.00313397  | 0.022404822 | 0.09 | 0.11 | 0.09 | 0.37 | HSP90A B2P     | chr4  | transcribed_processed_pseudogene   | heat shock protein 90kDa alpha (cytosolic), class B member 2, pseudogene |  |  |  |  |  |  |  |  |  |  |
| ENSG00000157653.11 | -1.830909693 | -1.076659528 | 0.000163108 | 0.002238544 | 0.27 | 0.29 | 0.08 | 0.06 | C9orf43        | chr9  | protein_coding                     | chromosome 9 open reading frame 43                                       |  |  |  |  |  |  |  |  |  |  |
| ENSG00000230268.3  | 6.228566639  | -2.487384439 | 1.17E-05    | 0.000263728 | 0    | 0    | 0    | 0.86 | SSU72P8        | chr7  | processed_pseudogene               | SSU72 pseudogene 8                                                       |  |  |  |  |  |  |  |  |  |  |
| ENSG00000060558.3  | 1.111398245  | -0.524446205 | 0.002894424 | 0.021063952 | 0.28 | 0.12 | 0.12 | 0.65 | GNA15          | chr19 | protein_coding                     | guanine nucleotide binding protein (G protein), alpha 15 (Gq class)      |  |  |  |  |  |  |  |  |  |  |
| ENSG00000227449.8  | -1.65342152  | -0.691933525 | 8.97E-05    | 0.001393933 | 0.43 | 0.3  | 0.12 | 0.12 | RP11-111F5.5   | chr9  | transcribed_unprocessed_pseudogene |                                                                          |  |  |  |  |  |  |  |  |  |  |
| ENSG00000214248.2  | 1.673437285  | -1.903767574 | 0.007351292 | 0.042881724 | 0.03 | 0.02 | 0.01 | 0.12 | CTD-3193O13.12 | chr19 | antisense                          |                                                                          |  |  |  |  |  |  |  |  |  |  |
| ENSG00000163803.12 | 1.011989838  | 0.33400952   | 0.000293465 | 0.003640599 | 0.15 | 0.17 | 0.16 | 0.41 | PLB1           | chr2  | protein_coding                     | phospholipase B1                                                         |  |  |  |  |  |  |  |  |  |  |
| ENSG00000268744.1  | 1.557855437  | -0.044587341 | 1.09E-06    | 3.71E-05    | 0.26 | 0.12 | 0.4  | 0.58 | CTD-3105H18.14 | chr19 | protein_coding                     |                                                                          |  |  |  |  |  |  |  |  |  |  |
| ENSG00000260743.1  | 6.130670652  | -2.552116476 | 2.24E-05    | 0.000452395 | 0    | 0    | 0.13 | 0.16 | RP11-255C15.3  | chr3  | lincRNA                            |                                                                          |  |  |  |  |  |  |  |  |  |  |
| ENSG00000130988.12 | 8.943605295  | -0.190347926 | 4.35E-29    | 2.80E-26    | 0    | 0    | 0.78 | 0.63 | RGN            | chrX  | protein_coding                     | regucalcin                                                               |  |  |  |  |  |  |  |  |  |  |
| ENSG00000259826.1  | 1.888270313  | -1.402812218 | 0.000254202 | 0.003220254 | 0.04 | 0.09 | 0.32 | 0.1  | RP11-467D6.1   | chr7  | antisense                          |                                                                          |  |  |  |  |  |  |  |  |  |  |
| ENSG00000260886.1  | 3.162547163  | -1.448757698 | 9.01E-08    | 4.29E-06    | 0.15 | 0    | 0.33 | 0.94 | TAT-AS1        | chr16 | antisense                          | TAT antisense RNA 1                                                      |  |  |  |  |  |  |  |  |  |  |

|                   |              |              |             |             |      |      |      |      |               |       |                       |  |
|-------------------|--------------|--------------|-------------|-------------|------|------|------|------|---------------|-------|-----------------------|--|
| ENSG00000256745.1 | 6.678710825  | -2.163916392 | 2.56E-07    | 1.05E-05    | 0    | 0    | 0.41 | 0.8  | RP11-680H20.1 | chr11 | processed_pseudo gene |  |
| ENSG00000260966.1 | 1.925695125  | -0.833530975 | 3.70E-06    | 0.00101299  | 0.04 | 0.04 | 0.09 | 0.21 | RP11-690D19.3 | chr11 | sense_overlapping     |  |
| ENSG00000272264.1 | -1.467589217 | -0.906589043 | 0.001332878 | 0.011566391 | 1.17 | 1.15 | 0.15 | 0.6  | RP11-92K15.3  | chr8  | lincRNA               |  |
